# Supplementary material for: Extracting Diagnoses and Investigation Results from Unstructured Text in Electronic Health Records by Semi-Supervised Machine Learning
Source: PLOS journal article supplement (doi:10.1371/journal.pone.0030412), 2012-01-19
Supplement: S2 (10.1371/journal.pone.0030412.s002) [file journal.pone.0030412.s002]

# Freertext algorithm documentation

Anoop Shah, Clinical Epidemiology Group

December 2011

---

This program extracts structured information in the form of Read terms, dates and numerical values from unstructured free text. This document describes the most updated version of the program. It is a Microsoft Access 2000 database but the algorithm itself does not use Access tables while working, except for data input and output.

The program was developed initially in 2003-2005 by Anoop Shah working for the General Practice Research Database (GPRD) Division of the Medicines and Healthcare products Regulatory Agency.

## Contents

|                                                   |          |
|---------------------------------------------------|----------|
| <b>I. GENERAL DESCRIPTION AND USER GUIDE</b>      | <b>7</b> |
| <b>1. Program output</b>                          | <b>7</b> |
| <b>2. Algorithm</b>                               | <b>7</b> |
| 2.1. Analysis modes . . . . .                     | 7        |
| 2.2. Rationale for design of the system . . . . . | 9        |
| 2.2.1. Selection of terms . . . . .               | 11       |
| 2.2.2. Why we included OXMIS terms . . . . .      | 11       |
| 2.2.3. Adding new codes . . . . .                 | 11       |
| 2.3. Analysis sequence . . . . .                  | 11       |
| 2.3.1. Sub main_termref . . . . .                 | 12       |
| 2.3.2. Sub main . . . . .                         | 13       |
| 2.4. Core tables . . . . .                        | 14       |
| 2.4.1. Terms table . . . . .                      | 14       |
| 2.4.2. Attrib2 table . . . . .                    | 15       |
| 2.4.3. Synonym table . . . . .                    | 15       |
| 2.4.4. Checkterms table . . . . .                 | 15       |

|           |                                                        |           |
|-----------|--------------------------------------------------------|-----------|
| 2.4.5.    | Ignore table . . . . .                                 | 17        |
| 2.4.6.    | Ignore_phrase table . . . . .                          | 17        |
| 2.5.      | Machine-generated tables . . . . .                     | 18        |
| 2.5.1.    | Singlewords . . . . .                                  | 18        |
| 2.5.2.    | Doublewords . . . . .                                  | 18        |
| 2.5.3.    | Wordlist . . . . .                                     | 18        |
| 2.6.      | Input and output tables . . . . .                      | 19        |
| 2.7.      | Maintenance . . . . .                                  | 19        |
| 2.7.1.    | List of common English words: 2of4brif table . . . . . | 19        |
| 2.7.2.    | Read_attr1 table . . . . .                             | 21        |
| 2.7.3.    | Read_attr2 table . . . . .                             | 21        |
| 2.7.4.    | Oxmis_termref table . . . . .                          | 22        |
| <b>3.</b> | <b>How to use the program</b>                          | <b>22</b> |
| 3.1.      | Form freetext . . . . .                                | 22        |
| 3.2.      | Analysing a single text . . . . .                      | 22        |
| 3.3.      | Viewing the results . . . . .                          | 23        |
| 3.4.      | Analysing a set of texts . . . . .                     | 23        |
| 3.5.      | Importing texts to the input table . . . . .           | 25        |
| 3.6.      | Using text files . . . . .                             | 25        |
| <b>4.</b> | <b>Examples of analysis</b>                            | <b>25</b> |
| 4.1.      | Normal mode . . . . .                                  | 25        |
| 4.2.      | Append mode . . . . .                                  | 25        |
| 4.3.      | Death mode 'D' . . . . .                               | 26        |
| 4.4.      | Lab test mode 'L' . . . . .                            | 26        |
| 4.5.      | Investigation result mode 'N' . . . . .                | 26        |
| 4.6.      | Pregnancy mode 'P' . . . . .                           | 27        |
| 4.7.      | Sicknote mode 'S' . . . . .                            | 27        |
| 4.8.      | Time or date mode 'T' . . . . .                        | 27        |
| <b>5.</b> | <b>Attributes</b>                                      | <b>27</b> |
| 5.1.      | Read terms . . . . .                                   | 27        |
| 5.2.      | Dates . . . . .                                        | 28        |
| 5.3.      | Duration . . . . .                                     | 28        |
| 5.4.      | Lab tests . . . . .                                    | 29        |
| <b>6.</b> | <b>How to modify the algorithm tables</b>              | <b>30</b> |
| 6.1.      | Form terms2: terms . . . . .                           | 30        |
| 6.2.      | Form terms2: synonyms . . . . .                        | 30        |
| 6.2.1.    | Data entry fields . . . . .                            | 31        |
| 6.2.2.    | Buttons . . . . .                                      | 31        |
| 6.2.3.    | How to add a new synonym . . . . .                     | 32        |
| 6.3.      | Form add_termlist . . . . .                            | 33        |
| 6.3.1.    | Set Include=TRUE for a single term . . . . .           | 33        |

|            |                                                              |           |
|------------|--------------------------------------------------------------|-----------|
| 6.3.2.     | Set Include=TRUE for a set of terms . . . . .                | 33        |
| 6.3.3.     | Set the Read term category for a set of terms . . . . .      | 34        |
| 6.3.4.     | To regenerate the terms table . . . . .                      | 34        |
| 6.4.       | Form attrib2 . . . . .                                       | 34        |
| 6.4.1.     | Buttons . . . . .                                            | 35        |
| 6.4.2.     | Format of attribute patterns . . . . .                       | 36        |
| 6.4.3.     | Data entry fields . . . . .                                  | 37        |
| 6.4.4.     | How to add a new pattern for an existing attribute . . . . . | 37        |
| 6.4.5.     | How to add a new attribute . . . . .                         | 38        |
| 6.5.       | Other tables . . . . .                                       | 38        |
| <b>7.</b>  | <b>Testing the algorithm</b>                                 | <b>38</b> |
| 7.1.       | Using the freetext form . . . . .                            | 38        |
| 7.2.       | Analysis reports . . . . .                                   | 39        |
| 7.2.1.     | Overall analysis . . . . .                                   | 39        |
| 7.2.2.     | Readscore . . . . .                                          | 41        |
| 7.3.       | Aggregate reports . . . . .                                  | 42        |
| <b>8.</b>  | <b>Program development</b>                                   | <b>43</b> |
| 8.1.       | Background . . . . .                                         | 43        |
| 8.2.       | Further development . . . . .                                | 44        |
| 8.3.       | Major changes . . . . .                                      | 44        |
| 8.3.1.     | Information extracted . . . . .                              | 44        |
| 8.3.2.     | User interface . . . . .                                     | 44        |
| 8.3.3.     | Changes made to increase speed . . . . .                     | 44        |
| <b>II.</b> | <b>GUIDE TO VISUAL BASIC CODE</b>                            | <b>45</b> |
| <b>9.</b>  | <b>Module freetext_core</b>                                  | <b>45</b> |
| 9.1.       | Global variables and constants . . . . .                     | 45        |
| 9.2.       | Sub init_all . . . . .                                       | 45        |
| 9.3.       | Function outfile_all As Boolean . . . . .                    | 46        |
| 9.4.       | Sub main_termref . . . . .                                   | 46        |
| 9.5.       | Sub main . . . . .                                           | 47        |
| 9.6.       | Sub initial_search . . . . .                                 | 47        |
| 9.7.       | Sub attrib_search . . . . .                                  | 48        |
| 9.8.       | Sub analyse_pd . . . . .                                     | 48        |
| 9.9.       | Function remove_ignorable As String . . . . .                | 49        |
| 9.10.      | Function readscore As Single . . . . .                       | 49        |
| 9.11.      | Function fuzzylink As Long . . . . .                         | 50        |
| <b>10.</b> | <b>Module attrib</b>                                         | <b>50</b> |
| 10.1.      | Global variables and constants . . . . .                     | 50        |
| 10.2.      | Sub init . . . . .                                           | 50        |

|                                                     |           |
|-----------------------------------------------------|-----------|
| 10.3. Sub infile . . . . .                          | 50        |
| 10.4. Sub outfile . . . . .                         | 51        |
| 10.5. Function dissect2_options As String . . . . . | 51        |
| 10.6. Sub pd_search2 . . . . .                      | 51        |
| <b>11. Module checkterms</b>                        | <b>51</b> |
| 11.1. Global variables and constants . . . . .      | 52        |
| 11.2. Sub init . . . . .                            | 52        |
| 11.3. Sub infile . . . . .                          | 52        |
| 11.4. Sub outfile . . . . .                         | 52        |
| 11.5. Sub check_all . . . . .                       | 52        |
| 11.6. Function in_list As Long . . . . .            | 53        |
| 11.7. Function if_qualify As Boolean . . . . .      | 53        |
| 11.8. Function if_dequalify As Boolean . . . . .    | 53        |
| <b>12. Module list</b>                              | <b>54</b> |
| 12.1. User-defined data types . . . . .             | 54        |
| 12.2. Global variables and constants . . . . .      | 54        |
| 12.3. Function bestmatch As String . . . . .        | 54        |
| 12.4. Function expand As termlist . . . . .         | 54        |
| 12.5. Sub test . . . . .                            | 55        |
| 12.6. Sub display . . . . .                         | 55        |
| 12.7. Function add_termlists As termlist . . . . .  | 55        |
| 12.8. Function getlist As termlist . . . . .        | 56        |
| 12.9. Function wordtermrefs_count As Long . . . . . | 56        |
| <b>13. Module pd</b>                                | <b>56</b> |
| 13.1. Global variables and constants . . . . .      | 57        |
| 13.2. Sub check_compressed . . . . .                | 57        |
| 13.3. Sub remove_from_compressed . . . . .          | 57        |
| 13.4. Sub compress . . . . .                        | 58        |
| 13.5. Function correct_attr As Boolean . . . . .    | 58        |
| 13.6. Sub show_all . . . . .                        | 58        |
| 13.7. Sub show_all_2 . . . . .                      | 58        |
| 13.8. Function true_ As Long) . . . . .             | 59        |
| 13.9. Function Attr As String . . . . .             | 59        |
| 13.10Function mean As String . . . . .              | 59        |
| 13.11Sub del_attr . . . . .                         | 60        |
| 13.12Sub set_attr . . . . .                         | 60        |
| 13.13Sub set_mean . . . . .                         | 60        |
| 13.14Sub add_attr . . . . .                         | 60        |
| 13.15Sub add_mean . . . . .                         | 61        |
| 13.16Function part_nopunc As String . . . . .       | 61        |
| 13.17Function part_punc_nospace As String . . . . . | 61        |
| 13.18Function matchpattern As Boolean . . . . .     | 62        |

|                                                       |           |
|-------------------------------------------------------|-----------|
| 13.19Function matchposition As Boolean . . . . .      | 62        |
| 13.20Function matchoption As Boolean . . . . .        | 62        |
| 13.21Sub init_read . . . . .                          | 63        |
| 13.22Function st_type As Long . . . . .               | 63        |
| 13.23Sub clear . . . . .                              | 63        |
| 13.24Sub remove . . . . .                             | 63        |
| 13.25Function text As String . . . . .                | 64        |
| 13.26Sub set_text . . . . .                           | 64        |
| 13.27Function punct As String . . . . .               | 64        |
| 13.28Function max As Long . . . . .                   | 64        |
| 13.29Function part_punc As String . . . . .           | 65        |
| <b>14. Module strfunc</b>                             | <b>65</b> |
| 14.1. Global variables and constants . . . . .        | 65        |
| 14.2. Function get_date As String . . . . .           | 65        |
| 14.3. Function get_date_average As String . . . . .   | 66        |
| 14.4. Function words As String . . . . .              | 66        |
| 14.5. Function in_set As Boolean . . . . .            | 66        |
| 14.6. Function is_text As Boolean . . . . .           | 67        |
| 14.7. Function numwords As Long . . . . .             | 67        |
| 14.8. Function is_acronym As Boolean . . . . .        | 68        |
| 14.9. Function all_punc As Boolean . . . . .          | 68        |
| 14.10Function matchindex As Single . . . . .          | 68        |
| 14.11Function num_diff_char As Long . . . . .         | 68        |
| 14.12Function dissect As String . . . . .             | 69        |
| 14.13Function dissect2 As String . . . . .            | 69        |
| 14.14Function is_numeric As Boolean . . . . .         | 70        |
| 14.15Function phrase_match_pattern As Long . . . . .  | 70        |
| <b>15. Module synonym</b>                             | <b>70</b> |
| 15.1. Global variables and constants . . . . .        | 71        |
| 15.2. Sub infile . . . . .                            | 71        |
| 15.3. Sub outfile . . . . .                           | 71        |
| 15.4. Sub init . . . . .                              | 71        |
| 15.5. Sub del . . . . .                               | 72        |
| 15.6. Sub add . . . . .                               | 72        |
| 15.7. Sub add_with_acronym . . . . .                  | 72        |
| 15.8. Function get_search_summary As String . . . . . | 72        |
| 15.9. Function trylink_2 As String . . . . .          | 73        |
| 15.10Function s2_pos As Long . . . . .                | 73        |
| 15.11Function s1_pos As Long . . . . .                | 73        |
| 15.12Function s2 As String . . . . .                  | 74        |
| 15.13Function s1 As String . . . . .                  | 74        |
| 15.14Function s1_priority As Long . . . . .           | 74        |

|                                                            |           |
|------------------------------------------------------------|-----------|
| <b>16. Module terms</b>                                    | <b>74</b> |
| 16.1. Global variables and constants . . . . .             | 74        |
| 16.2. Sub infile . . . . .                                 | 75        |
| 16.3. Sub outfile . . . . .                                | 75        |
| 16.4. Sub init . . . . .                                   | 75        |
| 16.5. Function true_term As Boolean . . . . .              | 75        |
| 16.6. Function exact_read_termref As Long . . . . .        | 75        |
| 16.7. Function read_type As String . . . . .               | 76        |
| 16.8. Function std_term As String . . . . .                | 76        |
| 16.9. Function attrib_str As String . . . . .              | 76        |
| <b>17. Module wordlist</b>                                 | <b>76</b> |
| 17.1. Global variables and constants . . . . .             | 77        |
| 17.2. Sub infile . . . . .                                 | 77        |
| 17.3. Sub outfile . . . . .                                | 77        |
| 17.4. Sub init . . . . .                                   | 78        |
| 17.5. Sub init_ignore . . . . .                            | 78        |
| 17.6. Function in_wordlist As String . . . . .             | 78        |
| 17.7. Function in_wordlist_OLD As Boolean . . . . .        | 78        |
| 17.8. Function approx_wordlist As Long . . . . .           | 79        |
| 17.9. Function pos_wordlist As Long . . . . .              | 79        |
| 17.10Function pos_singlewords As Long . . . . .            | 79        |
| 17.11Function pos_doublewords As Long . . . . .            | 79        |
| 17.12Function sng_termref As Long . . . . .                | 80        |
| 17.13Function dbl_termref As Long . . . . .                | 80        |
| 17.14Function dbl_numwd As Long . . . . .                  | 80        |
| 17.15Function wordlist_termref As Long . . . . .           | 80        |
| 17.16Function termref_in_singlewords As Boolean . . . . .  | 81        |
| 17.17Function termref_in_doublewords1 As Boolean . . . . . | 81        |
| 17.18Function termref_in_doublewords2 As Boolean . . . . . | 81        |
| 17.19Function wordsearch As String . . . . .               | 81        |
| 17.20Function ignorable As Boolean . . . . .               | 82        |
| 17.21Function ignore_max As ignore_max() . . . . .         | 82        |
| 17.22Function ignore_words As String . . . . .             | 82        |
| 17.23Function remove_ignore_phrases As String . . . . .    | 82        |
| 17.24Function initial_process As String . . . . .          | 83        |
| <b>18. Module in_out</b>                                   | <b>83</b> |
| 18.1. Function filepath As filepath() . . . . .            | 83        |
| 18.2. Function input_string As String . . . . .            | 83        |
| 18.3. Function read_term As String . . . . .               | 83        |
| 18.4. Sub import_input_table . . . . .                     | 84        |
| 18.5. Sub do_input_table . . . . .                         | 84        |
| 18.6. Sub results_output . . . . .                         | 84        |
| 18.7. Sub do_text_file . . . . .                           | 85        |

|                                                            |           |
|------------------------------------------------------------|-----------|
| <b>19. Module maintenance</b>                              | <b>86</b> |
| 19.1. Global variables and constants . . . . .             | 86        |
| 19.2. Sub init_read_attr_tables . . . . .                  | 86        |
| 19.3. Function read_attribute As String . . . . .          | 86        |
| 19.4. Function make_std_term As String . . . . .           | 87        |
| 19.5. Function make_std_term_with_attr As String . . . . . | 87        |
| 19.6. Sub rm_attr . . . . .                                | 87        |
| 19.7. Sub delete_long_terms . . . . .                      | 88        |
| 19.8. Sub delete_superfluous_terms . . . . .               | 88        |
| 19.9. Function find_similar_term As Long . . . . .         | 88        |
| 19.10 Sub make_wordlist . . . . .                          | 88        |
| 19.11 Function count_t As Integer . . . . .                | 89        |
| 19.12 Sub term_remove_BATCH . . . . .                      | 89        |
| 19.13 Sub term_remove_NEW . . . . .                        | 89        |
| 19.14 Function read_code_oxmis As String . . . . .         | 89        |
| 19.15 Sub process_termlist . . . . .                       | 90        |
| 19.16 Sub expand_rightleft . . . . .                       | 90        |

# Part I.

## GENERAL DESCRIPTION AND USER GUIDE

### 1. Program output

The program processes unstructured free text and produces a table of structured data elements (data type, attribute, value), as shown in Table 1.

### 2. Algorithm

The program is designed to extract diagnostic Read terms and several other types of structured data from unstructured free text. In order to do so it uses the table of Read and OXMIS terms, as well as several custom tables for detection of patterns and conversion of synonyms.

#### 2.1. Analysis modes

The analysis mode can be selected automatically based on the meaning of the Read term associated with the text.

| <i>Data type</i>                                                                | <i>Possible attributes</i>                                                                                                                                                            | <i>Value</i>                                                    | <i>Description</i>                                                                                                                                                                      |
|---------------------------------------------------------------------------------|---------------------------------------------------------------------------------------------------------------------------------------------------------------------------------------|-----------------------------------------------------------------|-----------------------------------------------------------------------------------------------------------------------------------------------------------------------------------------|
| <b>READ</b>                                                                     | <i>Death mode:</i><br><b>Deathcause,</b><br><b>deathcause1a,</b><br><b>deathcause2</b> etc.<br><i>Others:</i><br><b>Family,</b><br><b>negfamily, query</b><br>+ others                | <b>Termref_uid</b> of<br>matched Read term                      | Match to Read<br>diagnostic term (i.e.<br>lettered chapter).<br>Tests, family history,<br>personal history,<br>investigations and<br>administrative terms<br>are currently not<br>used. |
| <b>DATE_full,</b><br><b>DATE_year,</b><br><b>DATE_time</b>                      | <i>Death mode:</i><br><b>deathdate,</b><br><b>certdate</b><br><i>Others:</i><br><b>admitdate,</b><br><b>followup, dob,</b><br><b>edd, lmp,</b><br><b>dateprev,</b><br><b>datenext</b> | Date                                                            | Date in various<br>formats.                                                                                                                                                             |
| <b>DURA_yrs_,</b><br><b>DURA_mths,</b><br><b>DURA_wks_,</b><br><b>DURA_days</b> | <b>duraprev,</b><br><b>duranext,</b><br><b>followup, age</b>                                                                                                                          | Number                                                          | Duration in various<br>formats.                                                                                                                                                         |
| <b>LABS</b>                                                                     | <b>gest, sysbp,</b><br><b>diabp,</b><br><b>haemoglobin, mcv,</b><br><b>pulse</b> and others                                                                                           | Numerical value or<br>'normal',<br>'abnormal', 'low',<br>'high' | Laboratory values.<br>'gest' is gestational<br>age in weeks.                                                                                                                            |
| <b>ATTR</b>                                                                     | <b>family, negative,</b><br><b>query</b>                                                                                                                                              | none                                                            | If the text suggests<br>that the Read Term<br>does not refer to a<br>definite diagnosis for<br>this patient (e.g.<br>" <i>Death</i> of mother",<br>" <i>Pneumonia</i><br>possible")     |

Table 1: Structured data format



**Death** searches for the cause of death and interprets 1a, 1b etc. as death certificate entries. Laboratory results are not extracted.

**Pregnancy** a duration given in weeks is interpreted as gestational age if it is less than 43 weeks.

**Labtest** a numerical value or 'normal', 'abnormal' etc. can be interpreted as the test result

**Normal / abnormal** 'normal', 'abnormal', 'nad', 'positive' etc. can be interpreted as the investigation result, but numerical values cannot.

**Date** only a single date is allowed in the output.

**Sicknote** dates are regarded as medical certificate start or end dates.

## 2.2. Rationale for design of the system

The UK General Practice Research Database (GPRD) is a large database of primary care records and is an important source of clinical information for epidemiology and drug safety research. It contains details of consultations, diagnoses, test results, prescriptions and referrals. General practitioners (GPs) code important diagnoses using a structured clinical terminology. Currently the 'Read' clinical terminology is used, but OXMIS (Oxford Medical Information System) was used previously, and SNOMED-CT (Systematized Nomenclature of Medicine–Clinical Terms) will be used in the future. Additional information is entered in free text associated with the coded entries.

Our aim was to develop a natural language processing system to extract diagnoses as Read terms from free text in the GPRD, thus allowing researchers to combine information in coded and unstructured data in research studies using primary care data. We chose to develop our system independently rather than adapting an existing system so that we would have access to all the code and would be able to optimise its performance. Our eventual aim is to develop software suitable for use by doctors when entering data. This will enable the majority of clinical information to be coded at the time of data entry, with minimal cost on the doctor's time.

Our 'Freetext' program uses manually entered lookup tables of phrases and synonyms, and simple semantic information from the Read terms themselves (e.g. negation) to identify appropriate Read terms for diagnoses stated in the text. The Read and OXMIS dictionaries were designed for coding by GPs and already incorporate synonymous terms with variations in the way doctors may express common diagnoses. We manually created a synonym table to allow the program to interpret a greater range of alternative phrases.

The algorithm was developed by an iterative process. After writing the initial program, we used it to analyse samples of several hundred randomly chosen free text entries, and reviewed the output manually. As well as the final structured output, the program produced a detailed report of the intermediate stages of analysis to make it easier to find the root cause of any mistake. We modified the lookup tables and program code based on the results of each test, re-tested the program on the same sample to verify that the errors had been resolved, and then tested it on a new sample of texts.

## Clinical terminology

The algorithm was principally designed to encode diagnoses in the free text to terms in the Read Clinical Terminology, which is the system used for the existing coded entries in the GPRD. Apart from diagnoses, the Read terminology includes codes for other categories of information such as history, examination findings, procedures and test results. Our algorithm was designed to extract some of these entries but the main focus was on diagnoses.

When GPRD started collecting data from general practice computer systems in 1987, practices were using the OXMIS dictionary (OXford Medical Information System) to encode clinical entries. Practices switched over to the Read dictionary at varying dates in the 1990s. The current GPRD (in 2011) uses only Read terms (with OXMIS terms having been converted to the Read equivalents), but when we started developing the software in December 2003, GPRD contained a mixture of Read and OXMIS terms, with a total of 104,802 terms available.

We standardised the wording of Read terms by replacing abbreviations such as ‘a/n’ (antenatal) with the full word, and removing phrases such as ‘NEC’ (not elsewhere classified) which would not be found in ordinary clinical text; the list of such replacements is in database table Read\_Attr1 (subsubsection 2.7.2). If some Read terms became identical after this process of standardisation, only one of them was retained. We categorised each word in a Read term as positive, negative, optional or ignorable, using the Read\_Attr2 table (subsubsection 2.7.3). For example, for the Read term K510000 ‘Cystocele without uterine prolapse’, the word ‘cystocele’ would have to have a positive attribute, ‘uterine prolapse’ would have a negative attribute and ‘without’ would be ignored. We used these allocations to define which words in a Read term need to be present in the text in order for the term to be matched. For example, in order to match the Read term B723z00 ‘Benign neoplasm of bronchus or lung NOS’, a phrase would only need to include one of the words ‘bronchus’ or ‘lung’. Short words which would not alter the meaning of the term if omitted (e.g. ‘of’, ‘or’ and ‘NOS’ in the example), and words which influence the true / false status of nearby words but have no other meaning (e.g. ‘lack of’) were designated as ignorable and did not need to be present in the text.

We wrote a function called ‘readscore’ to grade the closeness of a match between a text phrase and a Read term, with a minimum threshold for a satisfactory match (see subsubsection 7.2.2 and subsection 9.10). The function attempts to map each word or phrase in the text to a word or phrase in the Read term, and vice versa, in order to verify that they have the same meaning. Points are deducted from the readscore for each ignorable or negative word not matched, and for use of synonyms rather than identical words. The algorithm tries a number of possible matches for a text phrase and choose the match with the highest readscore. For example, the text phrase ‘Benign neoplasm of lung’ would preferentially be matched to the Read term with the same wording, even though it could also match ‘Benign neoplasm of bronchus or lung NOS’ with a lower readscore. However, for the text phrase ‘Benign neoplasm of bronchus’, there is no specific term, so the only valid match would be with the Read term ‘Benign neoplasm of bronchus or lung NOS’.

### **2.2.1. Selection of terms**

We manually defined a subset of terms which the algorithm was allowed to select. Terms with more than 5 non-ignorable words were excluded as they are too long and complex to match and are infrequently used. The final list contained 42,931 terms which the algorithm was allowed to select. Of these, 38,981 encoded medical diagnoses. This is particularly the case for Read Chapter 'T', which contains over 3000 terms describing specific (and often rare) external causes of injury, e.g. 'T546000 Sucked into jet - occupant of spacecraft injured'.

### **2.2.2. Why we included OXMIS terms**

The OXMIS dictionary is no longer used by GPs to encode information, and these codes have been replaced by their Read equivalents in most recent version of GPRD. However, we retained OXMIS codes in our program because they provide additional ways of expressing common diagnoses, and in some cases the mapped Read term is not exactly equivalent. For example, Read contains the term K510000 'Cystocele without uterine prolapse', but there is no Read term for cystocele without a statement of uterine prolapse. However, OXMIS contains the lone term 'CYSTOCELE', and this would be the preferred match to an unqualified statement about cystocele in the text. More than one OXMIS term may map onto a single Read term, thus some precision is lost with code conversion. We therefore retained OXMIS terms in the algorithm, but the output can easily be converted to Read terms if required.

### **2.2.3. Adding new codes**

Our system was designed to enable the easy addition of new codes, which may be useful for coding emerging diseases even before they are recognised in official coding terminologies. To demonstrate this concept, we created the terms 'Recently in hospital' and 'Rhabdomyolysis' because they were not included in Read or OXMIS, but can encode clinically useful information which may be present in free text.

## **2.3. Analysis sequence**

Figure 1 gives an overview of the analysis sequence, which is described in more detail in the following sections.

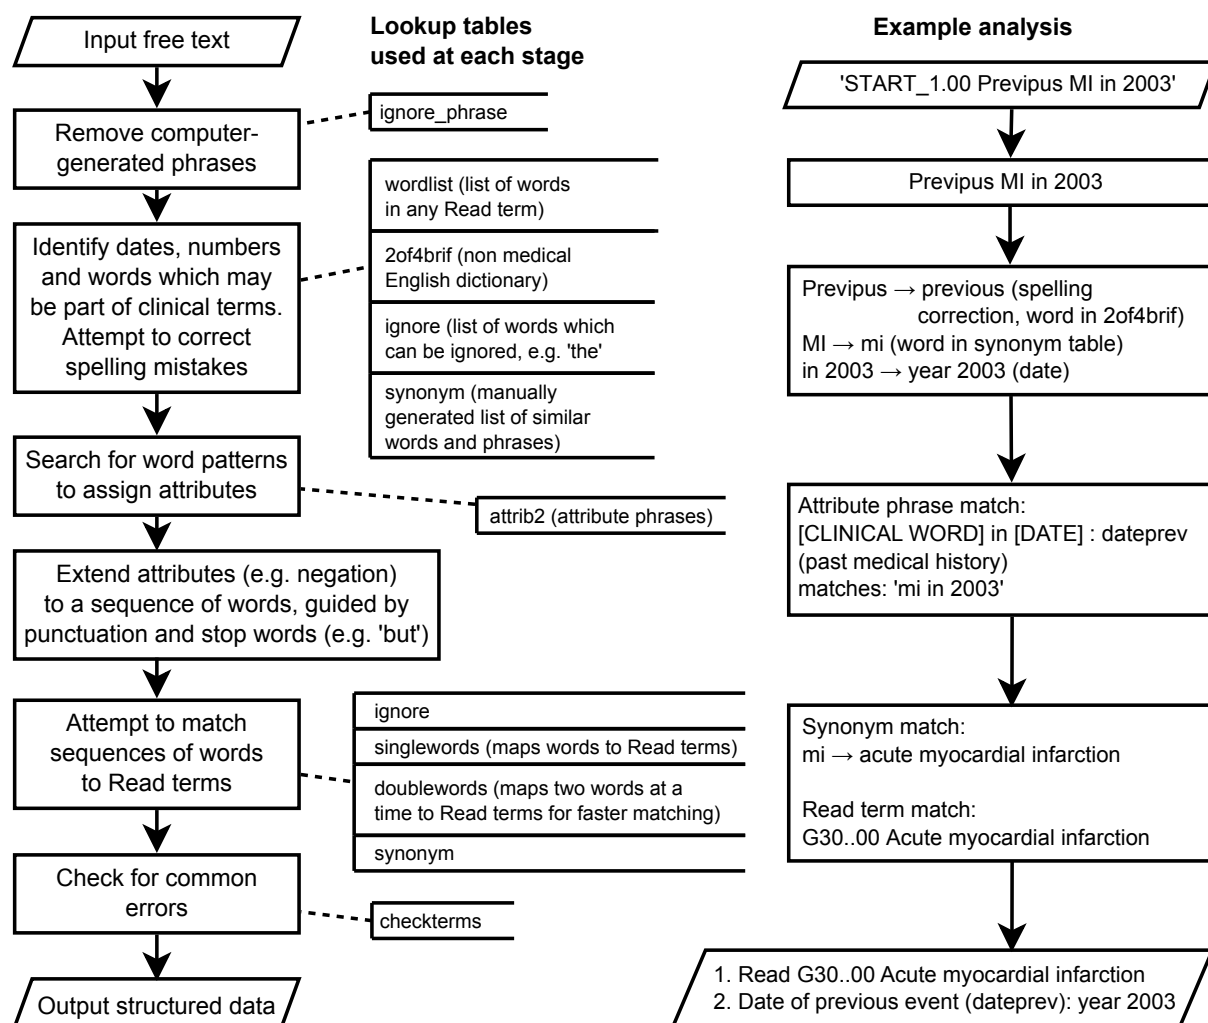

Figure 1: Overview of the steps involved in analysing a text, showing the lookup tables used at each stage and an example analysis

### 2.3.1. Sub main\_termref

This Sub calls **main** (see below) with the appropriate analysis options based on the termref of the original Read term.

One of the options is **append**, which can be set to TRUE if the free text should be appended to the Read term text (to appear as it would on the doctor's computer). Text is not appended if the Read term type is LABS, DATE or SICKNOTE. The Read term is analysed separately, and the first interpreted value from the main text is removed if it is the same as that from the Read term alone or the existing termref and there is no attribute. *MYOCARDIAL INFARCT* "Anterolateral" →

(no output)

*MYOCARDIAL INFARCT* "Father" →

1 READ family 303768 MYOCARDIAL INFARCT

See subsection 9.4 on page 46 for technical details.

### 2.3.2. Sub main

Carries out the analysis of **istring** according to the analysis options. The results are stored in the arrays in module **pd** (see section 13 on page 56). If **debug\_** is TRUE, the intermediate processes are documented in the global variable **debug\_string** (see page 39). See subsection 9.4 on page 46 for technical details. The analysis sequence is as follows (see Figure 1):

1. Initialise the **readscore** function (because it stores previous results); (subsection 9.10 on page 49)
2. Meaningless computer-generated phrases (e.g. “Hide=N”) are removed from the free text by **remove\_ignore\_phrases** (see subsection 17.23 and subsection 2.4.6). If the text appears to be from a structured data area, the function **wordlist.initial\_process** (subsection 17.24) extracts the useful information and converts it to a form suitable for further analysis.
3. The words and punctuation are assigned to arrays (module **pd**; by Sub **pd.init\_read**; see subsection 13.21).
4. The array of words is searched for dates, numbers, and entries in the synonym, ignore and wordlist tables. A data type is assigned to each word, which is **CLIN** (i.e. may be part of a Read term) for words in the synonym and wordlist tables. This search is carried out by (Sub **initial\_search**; see subsection 9.6).
5. The procedure **attrib.pd\_search2** uses the **attrib2** list (described on page 15) to find matching patterns, and attributes are assigned to phrases which match (see subsection 10.6).
6. The attributes are extended to nearby words according to certain rules in the program (e.g. a **negative** attribute is continued until a full stop, colon or the word ‘but’ is reached).
7. The text is analysed in sequences of up to 5 words with the data type **CLIN**. The words may be adjacent or may have ‘ignore’ words in between, such as ‘the’, ‘and’ etc. This is carried out by Sub **attrib\_search** (see subsection 9.7 on page 48).
8. Call **codeanalyse\_pd** to attempt to match sequences of clinical words to Read terms (subsection 9.8 on page 48). The program tries to find a Read term which matches the largest possible number of adjacent words, using the synonym table to link alternative phrases with the same meaning. Each word or phrase in the text is mapped to an individual word or phrase in the Read term, so the order of words does not matter. Negative parts of the text must map to negative parts of the Read term.
9. Call **pd.compress** to filter to include only the structured data extracted (subsection 13.4 on page 58).
10. Call **pd.check\_compressed** to check that each structured data element has an appropriate attribute and value for its data type (subsection 13.2 on page 57).

11. The output is condensed into a sequence of converted dates and Read terms with associated attributes. In some cases the output consists solely of an attribute, e.g. if the text consists of “father” then the output is **ATTR family** without a Read term.
12. Call **checkterms.check\_all** for a final validity check for a selected set of Read terms (subsection 11.5 on page 52).

## 2.4. Core tables

### 2.4.1. Terms table

A list of all Read and OXMIS terms used in the GPRD. It will need to be updated when new terms are used in the future. This table is used to derive the appropriate analysis mode and to test the text against candidate Read terms for conversion. Fields:

**Termref** GPRD term reference Uid

**Code** Read or OXMIS code

**Term** Original text version of term

**Readcode** For Read terms, this is the same as **Code**. For OXMIS codes, it is the Read code of the corresponding Read term. It enables the use of the Read hierarchy for term viewing and selection.

**chap1** First character of **Readcode**, for fast filtering by the **terms2** form (see page 30).

**chap2, chap3** Second and third characters of **Readcode**

**Type** Read term type:

**D** death

**L** investigation result which may have a numerical value

**M** medical (diagnostic) term (i.e. Read lettered chapter)

**N** investigation result which can only have a non-numerical value

**P** pregnancy

**T** time or date

**S** sick note

**Attr** Code describing whether each word of the Read term is true, false or ignorable (see page 30)

**std\_term** standardised version of the Read term

**Read** TRUE if it is a Read term, FALSE if it is OXMIS.

**Include** TRUE means that the terms is used for text conversion output. This includes most of the Read lettered chapters and selected terms from immunisations, symptoms, laboratory

results and physical examination. Many terms have been set to **Include=FALSE**, either manually if they are ambiguous, or automatically if they are too long.

### 2.4.2. Attrib2 table

Context patterns. Modified using form **attrib2** (page 34). Fields:

**w1, w2, w3, w4, w5** up to 5 words in the pattern. See Table 4 on page 36 for details.

**p1, p2, p3, p4, p5** punctuation following the 5 words.

**a1, a2, a3, a4, a5** attribute to assign.

**order** search order. Lower numbered patterns can overwrite the changes made by higher numbered patterns.

**death\_only** TRUE if this pattern is only used in 'Death' mode.

**text** for reference only; not used by program

**date** date pattern entered.

### 2.4.3. Synonym table

A manually generated list of similar words and phrases, modified using form **Terms2** (page 30). Fields:

**s1** word or phrase (up to 5 words) which might occur in free text

**s1\_num** number of words in **s1**

**s2** word or phrase (up to 5 words) which might occur in Read term

**s2\_num** number of words in **s2**

**priority** number coding the accuracy of the link (see page 32)

**date** date entry made

### 2.4.4. Checkterms table

This table lists 'qualifying' and 'dequalifying' strings for some termrefs. It has the following fields:

**termref** termref (link to **terms** table)

**qualify** comma separated list of qualifying words

**dequalify** comma separated list of dequalifying words

Some Read terms may appear in the text but may not apply to the current patient, according to the context. For example, “malaria” in the context of “prophylaxis” should not be converted to the Read term for malaria, or should have an attribute which shows that it is not a current diagnosis for this patient. The current version of the program does not have a specific attribute for ‘prophylaxis’, so in this case the word should simply be ignored.

Another example is “AF”, which usually means “atrial fibrillation”, but could also mean “anterior fontanelle” or something else. The program would convert this to ‘atrial fibrillation’ using the synonym table, which would be encoded as **READ 261645** (Atrial fibrillation). This termref is allowed only if the original text or Read term contains “ischaemic”, “heart”, “hypertens” etc. so that other instances of “AF” are not erroneously converted.

If a term has ‘qualifying’ words, then one of those words must be present in the original Read term or associated free text in order for the converted term to be allowed. If a qualifying word is not present, the Read term is removed from the output.

If a term has ‘dequalifying’ words, it is removed from the output if any of the dequalifying words is present. If both a qualifying and dequalifying word is present, the output is marked with the attribute **machinequery**, which marks it as requiring manual checking.

The table is edited using the form **checkterms** (see Figure 2).

**Checkterms -- for final checking of selected Read terms**

If both qualifying and dequalifying terms are found in the text, it is marked as 'machinequery'

Switch to form:

|                                                       |                                                           |
|-------------------------------------------------------|-----------------------------------------------------------|
| Term: O/E - collapse NOS                              | Qualify: faint, conscio, loc, fall                        |
| Termref: 203415 <input type="button" value="Delete"/> | Dequalify: cxr, radiograph, x-ray                         |
| Term: [X]Viral hepatitis                              | Qualify:                                                  |
| Termref: 206068 <input type="button" value="Delete"/> | Dequalify: vacc, immuni, travel, boost, antibody, antigen |
| Term: Posterior myocardial infarction NOS             | Qualify: posterior                                        |
| Termref: 216009 <input type="button" value="Delete"/> | Dequalify:                                                |
| Term: ACUTE HEPATITIS                                 | Qualify:                                                  |
| Termref: 220335 <input type="button" value="Delete"/> | Dequalify: vacc, immuni, travel, boost                    |

Record:   1   of 24

Figure 2: Checkterms form



### 2.4.5. Ignore table

This table consists of a single field (**word**) which lists ‘ignorable’ words and phrases. These are words which frequently occur in medical notes but do not relay any important information. For example, the word ‘of’ is ignorable to enable ‘injury of knee’ to map to ‘knee injury’. This table can be edited using the **ignore** form (see Figure 3).

Examples: ‘and’, ‘as’, ‘at’, ‘became’, ‘becoming’, ‘by’, ‘caused’, ‘causing’, ‘complains of’

The screenshot shows a window titled "ignore\_both : Form" with a "Switch to form:" dropdown menu. It contains two main sections: "ignore" and "ignore\_phrase".

The "ignore" section has a table with the following data:

| word                      |     |
|---------------------------|-----|
| and                       | Del |
| as                        | Del |
| at                        | Del |
| became                    | Del |
| becoming                  | Del |
| by                        | Del |
| cancel                    | Del |
| caused                    | Del |
| causing                   | Del |
| complains of              | Del |
| dis ce                    | Del |
| disease ce                | Del |
| disease classified elsew  | Del |
| diseases ce               | Del |
| diseases classified elsew | Del |
| due                       | Del |
| following                 | Del |
| from                      | Del |
| her                       | Del |
| his                       | Del |
| in                        | Del |

The "ignore\_phrase" section has a table with the following data:

| text                           |     |
|--------------------------------|-----|
| Con: 0                         | Del |
| Episode=F                      | Del |
| Episode=N                      | Del |
| Episode=O                      | Del |
| Hide=N                         | Del |
| Hosp: 0                        | Del |
| Location=Attendance at surgery | Del |
| Location=Elsewhere (non GMS)   | Del |
| Location=Outpatient (NHS)      | Del |
| Location=Visit                 | Del |
| Spec: 0                        | Del |
| START_1.00                     | Del |
| START_1.00 Episode: F          | Del |
| START_1.00 Episode: N          | Del |
| START_1.00 Episode: O          | Del |
| START_SUMMARY:                 | Del |
| *                              | Del |

At the bottom of each table, there is a "Record:" label with navigation buttons and a page indicator "1 of 16".

Figure 3: Form for editing the ignore and ignore\_phrase tables

### 2.4.6. Ignore\_phrase table

This table also has just one field (**text**) which lists *exact* phrases (including specific spacing and correct case) which are to be ignored because they are part of a structured data format. This format may be specific to VM or Vision; modifications to this table may be required if the program is to be used with other data sources. Words or phrases can be preceded by **START\_** to indicate that they apply only at the beginning of the free text string.

Examples:

|                              |
|------------------------------|
| <b>Text</b>                  |
| Con: 0                       |
| Episode=0                    |
| Hide=N                       |
| Location=Elsewhere (non GMS) |
| START_1.00                   |
| START_1.00 Episode : 0       |
| START_SUMMARY:               |

## 2.5. Machine-generated tables

These tables are generated by sub **make\_wordlist()** in module **maintenance**. They are generated from the **std\_term** of the subset of Read terms for which **Include=TRUE**.

### 2.5.1. Singlewords

Each termref contributes one row per non-ignorable word. The table has 3 columns:

**words** a single word which appears in a Read **std\_term**

**termref** the termref in which the word appears

**numwd** the number of non-ignorable words in the **std\_term**

### 2.5.2. Doublewords

This table is similar to **singlewords** except that the **words** column contains every pair of non-ignorable words that appears in a Read term, with each pair in alphabetical order. For example, Read term 279879 'Infective otitis externa due to erysipelas' would generate the following rows:

| termref | numwd | words                |
|---------|-------|----------------------|
| 279879  | 4     | infective otitis     |
| 279879  | 4     | externa otitis       |
| 279879  | 4     | externa infective    |
| 279879  | 4     | erysipelas externa   |
| 279879  | 4     | erysipelas otitis    |
| 279879  | 4     | erysipelas infective |

### 2.5.3. Wordlist

This table has 2 columns:

**words** every word which occurs in a **std\_term**

**wordlength** the number of letters in the word

It is used in conjunction with the **2of4brif** table (see subsection 2.7.1 on page 19). The actual lookup table is generated by the union of the two tables:

```
SELECT wordlist.words, wordlist.wordlength, TRUE As Clinical FROM  
wordlist UNION  
SELECT [2of4brif].words, [2of4brif].wordlength, FALSE FROM [2of4brif]  
ORDER BY wordlength ASC, words ASC, Clinical ASC;
```

The list is sorted by **wordlength** and then by **words** alphabetically, enabling the program to search for a particular word and quickly find similar words of the same length.

## 2.6. Input and output tables

The database contains tables which can be used to analyse a batch of texts and check the results.

**Input** Text files can be imported into this table, and it also stores individual texts added separately. See Table 2.

**Output** Output from analysis. See Table 3.

**Debug** This table stores the analysis reports generated from analysis of each individual text if the appropriate option is selected (see subsection 7.2 on page 39).

**Reports** A list of SQLs, descriptions and accuracy results based on manual checking of the program output. The queries can be modified and run from the form **reports** (see subsection 7.3 on page 42). Fields: **ID**, **description**, **sqltext**, **result**

**File\_location** Fields **file type** and **path**. The path for 'Data' is the default entry in the data entry fields of form **batch** (see subsection 3.4 on page 23). The path for 'Wordlist' is for a temporary text file used by the program for storing lookup tables.

## 2.7. Maintenance

### 2.7.1. List of common English words: 2of4brif table

This is a publicly available list of common English words downloaded from <http://wordlist.sourceforge.net/>.

Documentation is provided at [wordlist.sourceforge.net/12dicts-readme.html](http://wordlist.sourceforge.net/12dicts-readme.html). This list is used in conjunction with **wordlist** for the spell checker, to ensure that common non-medical words are not misinterpreted as mis-spelt medical words. The two fields are **words** and **wordlength**, which correspond to the fields in the **wordlist** table (see subsection 2.5.3 on page 18).

| <i>Field name</i> | <i>Data type</i>        | <i>Description</i>                                                                                           |
|-------------------|-------------------------|--------------------------------------------------------------------------------------------------------------|
| id                | Integer                 | text_uid or automatic id                                                                                     |
| text              | rrMemo<br>(long string) | free text to be interpreted                                                                                  |
| termref           | Integer                 | associated Read term                                                                                         |
| checked           | Boolean                 | whether manually checked                                                                                     |
| read_missed       | Integer                 | number of Read diagnoses not detected                                                                        |
| dates_missed      | Integer                 | number of dates with attributes not detected                                                                 |
| labs_missed       | Integer                 | number of lab results not detected                                                                           |
| comments          | Text                    | comments entered during checking                                                                             |
| term_extra        | Boolean                 | whether the converted term is more detailed than the original term                                           |
| term_corr_happ    | Boolean                 | whether analysis of the free text correctly shows that the original Read term does not apply to this patient |

Table 2: Input table fields

| <i>Field name</i> | <i>Data type</i> | <i>Description</i>                                                                                                                                                                                                        |
|-------------------|------------------|---------------------------------------------------------------------------------------------------------------------------------------------------------------------------------------------------------------------------|
| id                | Integer          | links to id column of <b>input</b> table                                                                                                                                                                                  |
| order             | Integer          | order of output row from a single text                                                                                                                                                                                    |
| type              | Text             | data type (see Table 1)                                                                                                                                                                                                   |
| attribute         | Text             | attribute (see section 5)                                                                                                                                                                                                 |
| value             | Text             | termref, date or lab value                                                                                                                                                                                                |
| extra             | Text             | Read term, if data type is <b>READ</b>                                                                                                                                                                                    |
| auto_happ         | Boolean          | whether the algorithm considers that this Read term is an event which happened to this patient (i.e. attribute not 'family', 'negpmh', 'negative' or 'query'). Positive for all dates with attribute and all lab results. |
| actual_happ       | Boolean          | whether Read term is correct and <i>actually</i> happened to this patient (based on manual review), or whether the date or lab result is correct and applies to this patient                                              |
| important         | Boolean          | can be manually set to FALSE if the term is a duplicate; otherwise TRUE. If set to FALSE, the term is not considered in calculations of sensitivity or specificity.                                                       |
| corr_attr         | Boolean          | whether the attribute is optimal                                                                                                                                                                                          |
| corr_value        | Boolean          | whether the Read term is optimal                                                                                                                                                                                          |

Table 3: Output table fields

### 2.7.2. Read\_attr1 table

This table gives exact phrases or patterns in Read terms which may need to be ignored or replaced in order to generate the **std\_term**. Phrases can be removed or replaced (e.g. 'a/n' by 'antenatal'), and the patterns can apply only at the start or end of the Read term if necessary. Part of the table is reproduced below.

| Raw_pattern              | Replacement | Order | Position | Comment           |
|--------------------------|-------------|-------|----------|-------------------|
| [x]                      |             | 4     | START    | ICD-10 codes      |
| [so]                     |             | 5     | START    | Site of operation |
| other                    |             | 6     | START    |                   |
| nos                      |             | 7     | END      |                   |
| nec                      |             | 8     | END      |                   |
| symptom                  |             | 9     | END      |                   |
| not otherwise specified  |             | 10    | END      |                   |
| not elsewhere classified |             | 11    | END      |                   |
| site not specified       |             | 12    | END      |                   |
| a/n                      | antenatal   | 13    |          |                   |
| h/o                      | history of  | 14    |          |                   |

The Read\_attr1 and read\_attr2 tables can be modified using the form **read\_attr**. Both tables are sorted by the **Order** column which must contain unique integers. The search order can be altered by rearranging these numbers.

### 2.7.3. Read\_attr2 table

This table consists of a list of rules for producing the Read attribute string. This denotes whether each word in the **std\_term** version of the Read term is True (**T**), False (**F**), ignorable (**I**) or is an option (**O**) (e.g. 'Retained placenta or membranes' = **T0I0**). The following special codes can be used: **#**=number, **\***=text, **?**=anything. Punctuation is treated as a word at this stage but is coded **P**; these letters are removed from the final attribute string because the **std\_term** to which it refers does not have any punctuation. Here are some examples from this table:

| Pattern          | Attribute | Order | Comment    |
|------------------|-----------|-------|------------|
| * or *           | OIO       | 1     |            |
| * / * / *        | OIOIO     | 2     |            |
| * / *            | OIO       | 3     |            |
| * # / * #        | TTITT     | 11    | e.g. c6/c7 |
| requires a *     | TIT       | 12    |            |
| not yet *        | IIF       | 13    |            |
| not yet * *      | IIFF      | 14    |            |
| not signifying * | IIF       | 40    |            |
| , * neg          | PFI       | 51    |            |
| not specific * * | IIFF      | 52    |            |
| not specif * *   | IIFF      | 53    |            |
| without *        | IF        | 54    |            |

#### 2.7.4. Oxmis\_termref table

This table lists the termrefs of OXMIS terms (field: **termref**) and the Read terms to which they map (field: **read\_termref**). More than one OXMIS term can map to a single Read term.

## 3. How to use the program

Open the form **freetext** (see Figure 4). This displays one text at a time with the results of the analysis. There is a window which displays an analysis report, which can be used to diagnose the problem if there is an error in the analysis. The error can be prevented in the future by modifying the terms, attributes or synonym tables, which are accessible via buttons on the freetext form.

### 3.1. Form freetext

This form cycles through the rows in the input table. The analysis report is stored in the debug table, and the output subform is based on the output table. The associated Read term is obtained by linking to the terms table.

### 3.2. Analysing a single text

Click . This will bring up a dialog box in which the phrase can be pasted or typed. Further dialog boxes will be brought up for analysis options:

- whether to use spelling correction
- the termref or type of the associated Read term

Figure 4: Freetext form

- whether to append the free text on the end of the Read term and analyse both together

The text and the analysis results are added to the **input** and **output** tables. The analysis report is added to the **debug** table, and displayed to the right of the freetext screen. To re-analyse the current text, click **Re-analyse current phrase**.

### 3.3. Viewing the results

- Click **Goto** in the top left-hand corner to go to a specific ID.
- Click **Show all** to make the form cycle through all texts (default).
- Click **Show unchecked** to cycle through all texts with 'checked'=FALSE.

### 3.4. Analysing a set of texts

Open the form **batch** (this can be done by clicking **Batch analysis** on the form **freetext**); see Figure 5.

There are two options for analysing a set of texts: either importing them to the input table and placing the structured output in the output table, or using text files. The former option allows the form **freetext** to be used to inspect the analysis results one text at a time.

**batch : Form**

**Input file path**  
 C:\Documents and Settings\Anoop\My Documents\Freetext6\testing\

ID column: 1  
 text column: 2  
 Termref column: 0  
 Delimiter (blank=TAB):  
 File has header row: ☒

☐ Use termref  
☐ Append text to Read term  
☐ Death mode  
 not labtest  
☐ Pregnancy mode  
☐ Date mode  
☐ Sick certificate mode  
☐ Generate analysis report  
☒ **REBUILD LOOKUP TABLES**

Import file to 'input' table

Switch to form:

Analyse input table

**Output file path**  
 C:\Documents and Settings\Anoop\My Documents\Freetext6\testing\

Analyse and output to text file

|   |                              |                                                                 |
|---|------------------------------|-----------------------------------------------------------------|
| ▶ | file type: Data<br>path:     | C:\Documents and Settings\Anoop\My Documents\Freetext6\testing\ |
|   | file type: Wordlist<br>path: | C:\Documents and Settings\Anoop\My Documents\Freetext6\data.txt |
| * | file type:<br>path:          |                                                                 |

Figure 5: Form for selecting batch analysis options



### 3.5. Importing texts to the input table

**Text ID** and **termref** are optional. If the file does not contain either of these variables, set the relevant column to 0. Ids will be generated automatically if not provided. If IDs are provided, they must be unique. When a file is imported, existing data in the **input**, **debug** and **output** tables are erased.

### 3.6. Using text files

Type the full filepath of the input and output files in the boxes provided. The options to the right of the table apply when analysing the input table or when using text files. The output file format is tab delimited: **id**, **order**, **data type**, **attribute**, **value**. Note that a single input row can generate several output rows, which are numbered in the **order** field.

## 4. Examples of analysis

### 4.1. Normal mode

“re,pill on loestrin and antibiotics could she be pregnant ? will wait 1 week before starting ovran” →

|   |           |       |        |          |
|---|-----------|-------|--------|----------|
| 1 | READ      | query | 283679 | PREGNANT |
| 2 | DURA_wks_ |       | 1      |          |

“wound still sloughy at the bottom. cleaned and dressed w idoflex and dd, see 2/7” →

|   |           |          |        |          |
|---|-----------|----------|--------|----------|
| 1 | READ      |          | 305620 | WOUND(S) |
| 2 | DURA_days | followup | 2      |          |

“160/90 SEE 1/12” →

|   |           |          |     |  |
|---|-----------|----------|-----|--|
| 1 | LABS      | sysbp    | 160 |  |
| 2 | LABS      | diabp    | 90  |  |
| 3 | DURA_mths | followup | 1   |  |

“warfarin 4mg od - inr 3.3 - rev 2/52” →

|   |           |          |     |  |
|---|-----------|----------|-----|--|
| 1 | LABS      | inr      | 3.3 |  |
| 2 | DURA_wks_ | followup | 2   |  |

### 4.2. Append mode

The original Read or OXMIS term is in *italics*

*ALLERGY* “PENICILLIN RASH” →

1 READ 305707 ALLERGY PENICILLIN

*Osteoarthritis* “right knee. Advised weight reduction, gentle exercise etc. Paracetamol for pain relief.” →

1 READ 244091 Knee osteoarthritis NOS

2 READ 309078 Pain

*Chest pain* “CHEST WALL” →

1 READ 309182 Chest wall pain

### 4.3. Death mode ‘D’

“1a mi 1b coronary atherosclerosis 2 renal impairment, diabetes” →

1 READ deathcause1a 298318 Acute myocardial infarction

2 READ deathcause1b 298326 Coronary atherosclerosis

3 READ deathcause2 234604 Renal impairment

4 READ deathcause2 303256 DIABETES

“died on 25/7/04. cert at 18:30. R.I.P. Sudden unexpected death - Refer to coroner.” →

1 READ 302004 DIED

2 DATE\_full deathdate 25-Jul-2004

3 DATE\_time 18:30

4 READ 230556 Death

5 READ 296901 Referral to coroner

### 4.4. Lab test mode ‘L’

*Gamma - G.T. level* “Original result: ‘GGT’ = 19(5 - 50)” →

1 LABS 19

*Red blood cell distribution width* “\*\*\* NUMERIC VALUE SUPPLIED: = 13.3 \*\*\*” →

1 LABS 13.3

### 4.5. Investigation result mode ‘N’

*Urinalysis - general* “nad” →

1 LABS nad

## 4.6. Pregnancy mode 'P'

*Antenatal care* "28/40+4 no problems, fundus=dates, fmf, dipstick neg, BP 124/72" →

```
1 LABS gest 28
2 LABS sysbp 124
3 LABS diabp 72
```

*PREGNANT* "34wks" →

```
1 LABS gest 34
```

## 4.7. Sicknote mode 'S'

*MEDICAL CERTIFICATE* "6 month" →

```
1 DURA_mths sicknote 6
```

*MED3 - doctor's statement* "3 weeks injured ankle" →

```
1 DURA_wks_ sicknote 3
2 READ 218088 Other ankle injury
```

## 4.8. Time or date mode 'T'

*Date ceased smoking* "23.8.97" →

```
1 DATE_full date 23-Aug-1997
```

*Patient date of birth* "15 February 1945" →

```
1 DATE_full date 15-Feb-1945
```

# 5. Attributes

## 5.1. Read terms

**deathcause1a, deathcause1b, deathcause1c** Cause of death – death certificate categories; e.g. '1a) MI b) coronary atheroma' → 'MI' has attribute **deathcause1a**; 'coronary atheroma' is **deathcause1b**

**deathcause1c**

**deathcause1**

**deathcause2**

**deathcause** Specifically stated as cause of death; e.g. “Cause of death: bronchopneumonia”

**negative** Associated clinical term is negative, e.g. “not cancer”

**family** Clinical term is associated with family member, not patient e.g. “wife has cancer”

**negfamily** negative family history; e.g. “no family history of stroke”

**pmh** past medical history e.g. “asthma age 7”

**negpmh** negative past medical history e.g. “no previous MI”

**query** Uncertainty about diagnosis (‘query’ or ‘rule out’), e.g. “rule out MI”

**dueto** previous condition was caused by this condition, e.g. “MI due to atherosclerosis”

**causing** this condition was caused by previous condition e.g. “Septicaemia complicated by renal failure”

## 5.2. Dates

**certdate** or time when death was certified

**admitdate** admission or readmission date

**dischdate** discharge date

**deathdate** death date or time

**Imp** last menstrual period

**dob** date of birth (date of birth is not available in GPRD for confidentiality reasons. However it may be useful for verification exercises requiring record linkage, such as linking to death certificates or the mother-baby link.)

**edd** expected date of delivery

**datenext** date refers to next Read term (e.g. “1990 stroke”)

**dateprev** date refers to preceding Read term (e.g. “MI in 1982”)

**followup** follow up date

**sicknote** any date in a medical certificate entry (may be start or end date of certificate)

Only **certdate** and **deathdate** are allowed to be times. If the program is not operating in death mode, no attempt is made to extract times. This is to reduce the risk of a number (e.g. a test result) being incorrectly interpreted as a time.

## 5.3. Duration

**duranext** duration refers to next Read term

**duraprev** duration refers to preceding Read term

**followup** follow up time (e.g. “see in 3 months”)

**age** e.g. “this 40-year-old man”

**ageprev** age at event relating to previous Read term, e.g. “diagnosed with asthma aged 10”

**sicknote** e.g. “*MED3* 1 week”

## 5.4. Lab tests

Note that laboratory results are not extracted in ‘Death’ analysis mode.

**calcium**

**cholesterol**

**cobalamin** Vitamin B12

**creatinine**

**diabp, sysbp** Blood pressure. The program recognises a format such as ‘150/80’ without ‘blood pressure’ stated explicitly, but only if the systolic pressure is higher than diastolic and both are in sensible ranges (sysbp 80–230, diabp 40–150)

**esr** Erythrocyte sedimentation rate

**fbc** Full blood count

**ferritin**

**folate**

**gest** Gestational age (duration in weeks, less than 43. In ‘pregnant’ mode, the program will interpret any duration in weeks as gestational age, as long as it does not have another attribute, and there no different duration in the text. Fractions are ignored by the function **strfunc.get\_date** which converts durations into a structured format, e.g. “32/40 + 6” is converted to ‘32 weeks’.)

**glyhb** HbA1c

**haemoglobin**

**hdl** HDL cholesterol

**inr** International normalised ratio

**ldl** LDL cholesterol

**mcv** Mean cell volume

**pefr** Peak flow (‘predicted’ or ‘best’ peak flow is ignored)

**platelets**

**pulse** pulse rate in beats per minute, must be within the range 20 to 300

**tetrathyroid** Thyroxine, T4

**trithyroid** T3

**tsh** Thyroid stimulating hormone

**triglycerides**

**urea**

**wbc** White blood cells, leucocytes (may apply to blood, urine or other fluids, depending on associated Read term)

The function **pd.correct\_attr** controls whether an attribute is correct for a particular meaning, except for **LABS** data type where this check is not used. It is possible to introduce a new **LABS** attribute without modifying the program code.

## 6. How to modify the algorithm tables

### 6.1. Form terms2: terms

The table of Read Terms is used for three purposes:

1. To decide the analysis options for the current text, based on its associated termref
2. To enable the free text to be appended to the text of the Read Term, in order to produce a complete statement which is similar to what the doctor would have seen when using the practice management system. This applies when using the analysis option 'Append'.
3. To derive the list of terms to which text can be converted (those with Include=TRUE).

The form terms2 displays the terms table and allows manipulation of the synonym table. By default it displays the entire table but it can be filtered on term, **termref** or **std\_term** (standardised term).

### 6.2. Form terms2: synonyms

The table of synonyms is used for three purposes:

1. Searching for candidate text in s1 to see if it is possibly part of a clinical term (from sub **freetext\_core.initial\_search**).
2. Generating a variation of the free text by substituting s1 components by their s2 links (function **list.expand**).

The screenshot shows a software window titled 'terms'. It is divided into several sections:

- SYNONYMS**: Contains a text box with 'myocardial infarction', a 'REBUILD LOOKUP TABLE' button, and a 'Switch to form:' dropdown set to 's1 - TEXT'. Below this are input fields for 'Text word' (containing 'mi') and 'Read word', a 'Use acronym' checkbox (checked), a 'Delete entry' button, and a 'Search for linked terms' button.
- ADD TO SYNONYM TABLE WITH PRIORITY:**: A grid of buttons for adding terms with different priorities: 1, 2, 3, 4 both, 5 both, and Opposites.
- TERMS**: A table listing medical terms with columns for ID, S, K, O, term, synonym, Type, Attribute string, and Include. The table contains 10 rows of data.
- Footer**: A 'Record:' status bar showing '1' of 42933 records.

|        | S | K | O | term                   | synonym                | Type | Attribute string | Include  |
|--------|---|---|---|------------------------|------------------------|------|------------------|----------|
| 500000 | S | K | 0 | Rhabdomyolysis         | rhabdomyolysis         | M    | T                | Del Test |
| 210617 | 1 | 2 | K | MOTHER WELL            | mother well            |      | TT               | Del Test |
| 237737 | 1 | 2 | K | MOTHER UNWELL          | mother unwell          |      | TT               | Del Test |
| 274466 | 1 | 2 | L | FATHER WELL            | father well            |      | TT               | Del Test |
| 256120 | 1 | 2 | L | FATHER UNWELL          | father unwell          |      | TT               | Del Test |
| 292612 | 1 | 2 | Z | CONSANGUINEOUS FAMILY  | consanguineous family  |      | TT               | Del Test |
| 283470 | 1 | 2 | Z | PARENTS CONSANGUINEOUS | parents consanguineous |      | TT               | Del Test |
| 237728 | 1 | 3 | 6 | TEETOTAL               | teetotal               |      | T                | Del Test |
| 203204 | 1 | 3 | 6 | Teetotaller            | teetotaller            |      | T                | Del Test |

Figure 6: Form terms2

- Trying to match a Read term segment to part of the free text, as part of a test of match accuracy (function `freetext_core.readscore`). This comparison is between the original free text segment (including ignorable words) and the Read term.

### 6.2.1. Data entry fields

**Text word** word or phrase to search for in unstructured text

**Read word** word or phrase to search for in Read term

**Use acronym** terms such as 'mi – myocardial infarction' will also be added as 'm i – myocardial infarction'.

### 6.2.2. Buttons

**Delete entry** deletes the link between Text word and Read word

**Search for linked terms** searches synonym table for s2-READ links to the entry in Text word, and also s1-TEXT links to the entry in Read word, and displays both sets of results. In the results the s1-TEXT terms are not directly linked to the s2-READ terms, but the s1-TEXT terms are linked to the Read word and s2-READ to Text word.

**1**, **2**, **3** adds the match between Text word and Read word with the selected priority

**Opposites** adds the match with a priority of -100

**1 both**, **2 both** **etc.** adds the match and also the same match with Read word and Text word swapped around.

**Rebuild lookup tables** regenerates the temporary text file used for rapid loading of the lookup tables. This needs to be done before analysing text, if any changes have been made to the tables..

### 6.2.3. How to add a new synonym

- Type the text phrase in the **Text word** box (lower case, with one space between words, no punctuation).
- Type the standardised Read phrase to which it will match in the **Read word** box.
- Click one of the buttons (e.g. **4**, **5** etc.) under ‘Add to synonym table with priority’ to add the link to the table. If the link already exists, it will be over-written with the new priority.
- Just before analysing the next text, click **Rebuild lookup tables** to ensure that all the changes are implemented.

### Priorities

- 5** exact match e.g. ‘chronic obstructive pulmonary disease’ ↔ ‘copd’; the match is automatically made both ways.
- 4** almost exact match e.g. ‘abnorm’ ↔ ‘abnormal’; the match is automatically made both ways.
- 3** moderate match (e.g. text phrase is mis-spelt or is more specific than Read phrase); e.g. ‘b pne’ → ‘bronchopneumonia’; ‘carcinoma’ → ‘malignant neoplasm’
- 2** non-standard abbreviation or distorted form; possible one-way match (Read phrase is wider than text phrase); e.g. ‘rsi’ → ‘repetitive strain injury’
- 1** loosely associated (Read phrase much wider than text phrase); e.g. ‘foot’ → ‘lower limb’
- 100** Opposite; e.g. ‘left’ ≠ ‘right’, ‘finger’ ≠ ‘toe’

When searching for the best Read term match, links with higher priority are used where possible.

When the function **list.expand** searches on s1 for alternative words, the search text has been stripped of ‘ignorable’ words, so for example if the free text contained ‘A and E’, the search text would be ‘a e’. This means that for any synonym link involving ‘a and e’ there should be a corresponding link with ‘a e’. This additional match is made automatically, with priority 1, whenever a synonym link is added ‘both ways’.



**add\_termlist : Form**

Comma-separated list of termref Uids

210617

1. Set include=TRUE for these terms

2. Generate attrib\_str and std\_term for these terms

3. Convert 'l' and 'r' to 'right' and 'left'

4. Regenerate wordlists

Read term category

|   |                      |
|---|----------------------|
| D | Death                |
| P | Pregnant             |
| L | Numeric lab value    |
| N | Investigation result |
| S | Sick note            |
| T | Date                 |
| M | Diagnosis            |
| - | Nothing (default)    |

Assign category to these terms

Set include=FALSE for these terms

Set include=FALSE for duplicate terms

Set include=FALSE for excessively long terms

Switch to form:

Figure 7: Form add\_termlist

### 6.3. Form add\_termlist

Used for setting the read term type, and adding terms for conversion (see Figure 7).

#### 6.3.1. Set Include=TRUE for a single term

1. In the terms2 form, tick the ☐ Include check box for each term to add.
2. Open add\_termlist and click .

After setting Include=FALSE using the  button on the terms2 form, there is no need to regenerate the wordlists.

#### 6.3.2. Set Include=TRUE for a set of terms

1. Either paste a list of the termref Uids (comma separated) in the text box, or use the **Terms2** form and filter it to show only the required terms, then click .
2. Click .
3. If these terms have blank std\_term or attribute strings, click  then .

4. Click 4. Regenerate wordlists. This regenerates the **singlewords** and **doublewords** tables using the **std\_term** in the
5. 'Compact and repair' the database using the main Microsoft Access menu. This should be carried out regularly, and especially after modifying a large amount of data.
6. After setting Include=TRUE for a large number of terms, run the following procedures:
  - a) Set Include=FALSE for duplicate terms
  - b) Set Include=FALSE for excessively long terms.

### 6.3.3. Set the Read term category for a set of terms

1. Generate the set of termlist Uids as in step 1 above.
2. Click on the Read term category to set. 'Nothing' sets the category to blank.
3. Click Assign category to these terms.

### 6.3.4. To regenerate the terms table

Once **std\_term** and **attrib\_str** have been generated for all the terms, there would be no reason to change them unless an error is discovered. However if it is necessary, it can be done by deleting any termrefs in the box, then clicking buttons 2, 3, and 4 in order. Generating the **attrib\_str** and **std\_term** for the entire table takes about 30 minutes.

## 6.4. Form attrib2

The form **attrib2** displays the contents of the **attrib** table, which contains a list of word patterns which are used to derive the context of Read terms, lab results and dates (see Fig. fig:attrib2form). The boxes and buttons at the top are used to enter new terms. Existing terms can be edited directly in the main body of the form. The Filter list button can be used to restrict the patterns displayed to particular attributes or search positions for ease of use.

The attribute search takes place *after* detection of dates and durations but *before* analysis of Read terms. However, words which might form part of a Read term are marked with data type **CLIN**. Lab results are extracted during the attribute search. Some attributes are further manipulated by the core program.

Each row of the **attrib2** table contains up to 5 words with punctuation, and the attributes to which they map.

**attrib2**

New words:  Add term:  Leave a space between words and punctuation: ☐

New attribute:  Search position for new term (low number=high):

☒ Apply attribute to all words ☐ = set attribute to blank ☐ = leave attribute as it is

|                                                           | Search position for new term (low number=high) | Requery             | Filter list    | Death only?                            |
|-----------------------------------------------------------|------------------------------------------------|---------------------|----------------|----------------------------------------|
| 1 deathcause1a                                            | a deathcause1a                                 | t deathcause1a      | b deathcause1a | 5 <input checked="" type="checkbox"/>  |
| 1 deathcause1a                                            | a deathcause1a                                 | [CLIN] deathcause1a | b deathcause1b | 6 <input checked="" type="checkbox"/>  |
| 1 deathcause1a                                            | a deathcause1a                                 |                     |                | 8 <input checked="" type="checkbox"/>  |
| 1 deathcause1b                                            | b deathcause1b                                 |                     |                | 9 <input checked="" type="checkbox"/>  |
| 1 deathcause1c                                            | c deathcause1c                                 |                     |                | 10 <input checked="" type="checkbox"/> |
| type grade factor                                         | 2                                              |                     |                | 11 <input checked="" type="checkbox"/> |
| [NUMB_1_4]                                                | previous pmh                                   | [CLIN] pmh          |                | 12 <input type="checkbox"/>            |
| 2 deathcause2                                             | [CLIN]                                         |                     |                | 15 <input checked="" type="checkbox"/> |
| 1 deathcause1                                             | [CLIN]                                         |                     |                | 18 <input checked="" type="checkbox"/> |
| 2 deathcause2                                             | deathcause2                                    |                     |                | 20 <input checked="" type="checkbox"/> |
| adm admit admitted admission readmit readmitted admitdate | [DATE] admitdate                               |                     |                | 23 <input type="checkbox"/>            |
| adm admit admitted readmit readmitted admitdate           | admitdate                                      | [DATE] admitdate    |                | 24 <input type="checkbox"/>            |
| dis disch discharged dischdate                            | dischdate                                      | [DATE] dischdate    |                | 25 <input type="checkbox"/>            |
| dis disch discharge discharged dischdate                  | [DATE] dischdate                               |                     |                | 26 <input type="checkbox"/>            |
| dr anon                                                   | anon                                           | anon                | anon           | 27 <input type="checkbox"/>            |
| dr anon                                                   | anon                                           | anon                | anon           | 28 <input type="checkbox"/>            |

Record: 1 of 177

Figure 8: Form for editing the attrib2 table

### 6.4.1. Buttons

**Add term** adds a new pattern with words and attributes as in the appropriate boxes (see below for format)

**Requery** refreshes the query for the form

**Filter list** brings up a dialog box asking which attribute to filter by. Type in the attribute and click **OK** (\* can be used as a wildcard; e.g. 'death\*' would search for 'deathcause1a', 'deathdate' etc.).

**Move** brings up a dialog box asking for the new search position of the pattern. Type the new position or 999 to delete the pattern. On clicking OK, the patterns are re-arranged automatically.

**Rebuild lookup tables** regenerates the temporary text file used for rapid loading of the lookup tables. This needs to be done before analysing text, if any changes have been made to the tables.

### 6.4.2. Format of attribute patterns

The pattern can match up to 5 words. For each word you can specify a choice of words or data types which are acceptable for the match. If a data type rather than a specific word is given, it must be in square brackets (see Table 4).

| <i>Example or code</i> | <i>Meaning</i>                                                                     |
|------------------------|------------------------------------------------------------------------------------|
| *                      | Any word or punctuation                                                            |
| thisword               | Specific word: 'thisword'                                                          |
| this that [NUMB]       | Either 'this', 'that' or a number                                                  |
| 2                      | Specific number: 2                                                                 |
| [CLIN]                 | Any word which might be part of a Read term                                        |
| [IGNO]                 | An ignorable word, e.g. 'and', 'as', 'at', 'by'                                    |
| [NUMB]                 | Any word with data type 'number', which includes some lab results such as 'normal' |
| [NUMB_70_230]          | Number between 70 and 230                                                          |
| [DATE]                 | Date in any format                                                                 |
| [DATE_full]            | Full date                                                                          |
| [DATE_year]            | Year                                                                               |
| [DURA]                 | Duration in any format                                                             |
| [DURA_wks_]            | Durations in weeks                                                                 |
| [ATTR attribute]       | Any word with specified attribute                                                  |

Table 4: Attribute patterns

Punctuation is shown in the small boxes to the immediate right of the word. The asterisk (\*) is a wildcard character which means that any punctuation, or blank is acceptable. Underscore (\_) represents no punctuation. For other punctuation elements, if the punctuation is part of the pattern, it is accepted. For example, if the pattern is \_:= then ':', '=', ':=' or no punctuation would be allowed.

Attributes can be assigned to each of the words in the pattern. The following special codes can also be used:

**anon** Anonymise; do not analyse this part of the text (e.g. if it may contain the name of a doctor, patient or hospital)

**ignore** Ignore

**normalrange** Ignore any following lab values unless they have their own attribute

**possibility** Ignore any following diagnoses unless they have their own attribute

\_ (underscore) Retain current attribute

. (full stop) Set attribute to blank

**DATATYPE attribute** Set attribute to **attribute** and data type to **DATATYPE** (e.g. **LABS inr;**  
**DURA\_wks\_ followup**)

The *search position* is the order in which the patterns are used; those with higher search positions are used first. Attributes of patterns which are used later (i.e. with lower numbers) can overwrite attributes set by earlier patterns.

The ☐ **death only** check box means that this pattern is only used if the text is being analysed in 'death' mode.

### 6.4.3. Data entry fields

To add an attribute: type the text in the top text box, and the attributes below it. Leave a space between each word and punctuation.

**New words** type in the words for the new pattern, leaving one space between each word and the next, or a word and punctuation (e.g. tsh \* [NUMB])

**Apply attribute to all words** (check box) tick if all the words in the pattern have the same attribute, and type the attribute once only in the 'new attribute' box.

**New attribute** either word by word or just one for all words. Attributes can only be entered as one word using this system. If an entry is to have two words (e.g. 'LABS tsh'), where the first word is the data type and the second is the attribute, it has to be altered manually in the form after first entering it using the automatic system.

**Search position** Search position for new term. If this position is already taken, the existing patterns are moved out of the way to make room.

### 6.4.4. How to add a new pattern for an existing attribute

- Type in the pattern in the 'New words' box. Leave a space between words and punctuation. Use the codes described above.
- Type in the new attribute, with one space between words. If the new pattern has the same attribute for all words, tick the check box ☐ **apply attribute to all words**.
- If the rule should set the data type as well as the attribute, modify the entry in the attribute table afterwards.

For example, "chol [NUMB]" → **LABS cholesterol**:

1. Add attribute: words = 'chol \* [NUMB]'; new attribute = **cholesterol**, Apply attribute to all words = TRUE; Search position = whatever desired
2. Scroll down the form (or use ) to find the new pattern, and change the second attribute entry from **cholesterol** to **LABS cholesterol**. This entry corresponds to [NUMB], the actual value of the lab result.

### 6.4.5. How to add a new attribute

- Add the attribute pattern using the `attrib2` form as described above.
- For data type LABS this is all that is required. For other data types, modify the function `correct_attr` in module `pd` to allow the new attribute for that particular data type.
- Modify the program code if it is necessary to set the attributes in a way which is not possible using the **`attrib`** table.

## 6.5. Other tables

The other core tables have simple data entry forms corresponding to their names; please see the appropriate paragraph in subsection 2.4.

**checkterms** see subsection 2.4.4 on page 15.

**ignore, ignore\_phrase** see subsection 2.4.5 on page 17.

**Read\_attr1, Read\_attr2** see subsection 2.7.2 on page 21.

## 7. Testing the algorithm

### 7.1. Using the freetext form

The **freetext** form can be used to analyse a single text or check the results of a set of texts in turn. For a general guide to using this form, see subsection 3.1 on page 22. This section describes the data fields for recording conversion accuracy.

Each output data element has the following check boxes, which correspond to fields in the output table (see Table 3 on page 20):

**Happened: auto** For READ terms, this is whether the program thinks the event actually happened to this patient, as evidenced by the attribute. It is negative if the attribute is 'negative', 'family', 'query', 'negfamily', 'negpmh'. This variable is set by sub **results\_output** (see subsection 18.6 on page 84) and can not be altered manually from the form. For dates, this is TRUE if the date has an attribute. For Lab results it is always TRUE.

**Happened: actual** This is initially set to be the same as 'Happened: auto' but can be altered manually. If it does not correspond to 'Happened: auto' it means the computer has made an error.

**Important** Whether this output entry should be ignored because it is a duplicate. This is set to TRUE as default.

**Correct attribute** For READ terms, whether the attribute is the best possible choice. Default=TRUE. (If the attribute is completely wrong it might also affect 'Happened: actual'.) Dates and Lab results are considered to be wrong if the attribute is wrong.

**Correct value** For READ terms, whether the chosen Read term is the most specific and accurate term available. Default=TRUE. If the choice is completely wrong, 'Happened: actual' should also be set to FALSE.

There are also several fields in the input table (see also Table 2 on page 20):

**Comments** Click the button to add a comment.

**Read missed, Dates missed, Labs missed** Number of pieces of data not detected in each category. Click the buttons to increase the number by 1.

**Original term false** If the original term did not apply to this patient as evidenced by the free text (e.g. Read term 'DEATH' with free text 'of mother').

**New term better** Whether the new term combining the original Read term and free text is more specific than the original Read term (see subsection 4.2 on page 25 for examples).

## 7.2. Analysis reports

### 7.2.1. Overall analysis

Module `freetext_core` contains a global variable 'debug\_string', which can be used to store an analysis report if this option is chosen. When analysing a single text using the freetext form interface, the program automatically uses the debug option, and when analysing a batch of texts from the input table or a text file, this option is switched off to save time.

Various functions add entries to `debug_string` to document the stages of analysis. Line breaks are inserted by appending ASCII character 13 then character 10. This example is based on the following free text:

"another hospital admission- still having daily symptoms and using salbutamol +++++.To increase symbicort to 200/6 2pufbd and rev 1m if no improvement.Man /plan discussed."

The analysis report contains the following items (only selected portions of the analysis report are shown, to save space):

1. Heading `INITIAL_SEARCH, ATTRIB_PD_SEARCH2`
2. Attribute patterns which match to the text (show attrib phrase 'Matches to:' text phrase). Example:

```
Attrib phrase (search position 424): 1|[ATTR followup]
2|[DURA]| [DATE]*
Matches to: rev 1
```

Utility: shows which attribute patterns were used and the text they recognised. If a context is detected incorrectly, this part of the report shows whether the context was detected in

the first place. Modification or addition of patterns to the attribute table might reduce errors seen at this stage.

3. Listing of arrays in module pd, containing words, punctuation, attribute and meaning in separate arrays. This listing is after the words have been given provisional data types, and the attributes have been allocated according to the arrays. Example:

```
Word : Punctuation : Meaning : Attribute
another : : CLIN another :
hospital : : CLIN 3 2 :
admission : - : CLIN 3 2 :
still : : IGNO : ignore
having : : WORD having :
daily : : WORD daily :
symptoms : : CLIN 2 1 :
```

Utility: 'Word' column shows text after remove\_ignore\_phrases and initial\_process. 'Meaning' shows initial allocation of data types, particularly dates (function str\_func.get\_date is called to try to extract a date from every sequence of up to 5 words). 'Attribute' shows the result of attrib.pd\_search2 i.e. after recognition of patterns using the attribute table.

4. Heading ATTRIB\_SEARCH, ANALYSE\_PD
5. Show each sequence of words of data type 'CLIN' (possibly with 'IGNO' or 'NUMB' words in between) tested i.e. words which might be part of a Read term. Each section headed 'List of candidate terms' is the record of a single call to the function 'bestmatch' (see subsection 12.3 on page 54). This function is called with a sequence of up to 8 contiguous words from the text, and returns the match with the highest readscore or the first match found with readscore higher than threshold\_high. If a Read match is found, the report contains the readscore, termref Uid, Read term text, and the text to which it matches. Example of listing:

```
List of candidate terms
0 0 [another hospital]
0 0 [another hosp ]
0 0 [another hospital care ]
0 0 [another hosp l ]
Total 3 terms
```

```
List of candidate terms
0 0 [another]
Total 0 terms
```

```
List of candidate terms
0 0 [hospital admission]
100 309362 HOSPITAL ADMISSION
      [hospital admission]
```



Total 1 terms

Utility: Shows which sequences of words were chosen for conversion to Read terms (sub `freetext_core.analyse_pd`). Shows which alternative texts were generated by using the synonym table. Shows the converted text from which the Read term match was made, and the readscore (calculated with reference to the original text). Errors at this stage might be reduced by adding or editing synonym entries.

6. Listing of pd arrays, now containing linked Read termref Uids alongside text. Example:

```
Word : Punctuation : Meaning : Attribute
another : : CLIN another :
hospital : : READ 309362 100 :
admission : - : READ 309362 100 :
still : : READ 309362 100 :
having : : WORD having :
```

```
:
```

```
and : : IGNO : ignore
rev : : WORD rev : followup
1 : : DURA_mths 1 : followup
m : : : followup
if : : WORD if : followup
no : : IGNO : possibility
```

Utility: shows the original text which was linked to a Read term.

7. Heading: `PD.COMPRESS`, `PD.CHECK_COMPRESSED`
8. Listing of pd arrays, now containing one row per structured data element. Ignore the 'Word' and 'Punctuation' columns - at this stage the original text entry is no longer used by the program. Example:

```
Word : Punctuation : Meaning : Attribute
another : : READ 309362 100 :
hospital : : DURA_mths 1 : followup
```

Utility: useful for checking the effect of the sub `pd.check_compressed` (see subsection 13.2 on page 57), which rejects attributes and/or the data elements themselves if they do not make sense.

### 7.2.2. Readscore

The form **terms2** contains a button next to every term which can be used to test the readscore function (see subsection 9.10 on page 49). This calls up a dialog box for entry of the free text segment to test the Read term against. The procedure involves initialising the arrays as for a normal analysis. However, rather than trying out possible Read term matches, only the term of interest is used, and the score is calculated.

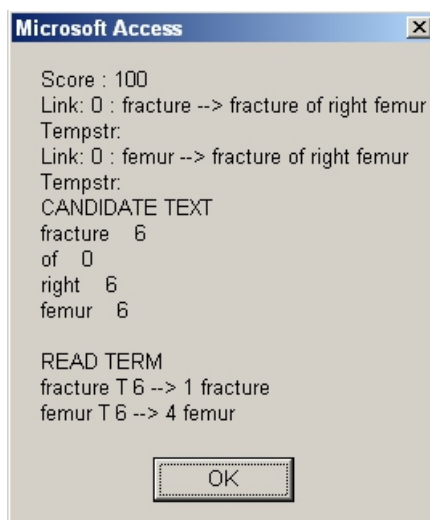

Figure 9: Dialog box displaying results of readscore test

The score is based mostly on the proportion of non-ignorable words in the candidate text mapped to a word in the Read term and vice versa, with a few extra points available for the priority of synonym matches, and whether ignorable words were mapped also. The result is displayed in a dialog box, showing the link made to each word of the original text and the Read term.

Example: testing 'fracture of right femur' with OXMIS term 'FRACTURE FEMUR'. The standardised Read term is 'fracture femur'. The word 'right' in the text is ignored as long as there is no word 'left' in the Read term.

The readscore is interpreted in view of the following thresholds, which are declared as constants in the module list: **threshold\_high** = 91; if match with this readscore is found, the program does not search for other matches. **threshold** = 87; minimum readscore for a satisfactory match

### 7.3. Aggregate reports

The **reports** form provides a convenient way to organise a set of queries and calculations to give an overall report of the algorithm performance. The data is stored in the table **reports**, which has the following fields:

**ID** autonumber

**sqltext** Either:

- An SQL 'SELECT COUNT' query which returns the answer in a variable called **result**
- A calculation using the results of other queries. The formula must start with '=', and references to previous results must be enclosed in braces { }.

**result** Output from the sqltext query or calculation

| reports                                       |     |                                                                                                                                              |        |
|-----------------------------------------------|-----|----------------------------------------------------------------------------------------------------------------------------------------------|--------|
| Update queries                                |     | To refer to results of previous queries, use curly brackets e.g. {5}                                                                         |        |
| 1                                             | SQL | SELECT count(*) As result from [input];                                                                                                      | result |
| Count of entries in input table               |     |                                                                                                                                              | 129    |
| 2                                             | SQL | SELECT Sum([input].read_missed) As result from [input];                                                                                      | result |
| Missed Read                                   |     |                                                                                                                                              | 1      |
| 3                                             | SQL | SELECT Sum([input].dates_missed) As result from [input];                                                                                     | result |
| Missed Dates                                  |     |                                                                                                                                              | 1      |
| 4                                             | SQL | SELECT Sum([input].labs_missed) As result from [input];                                                                                      | result |
| Missed Labs                                   |     |                                                                                                                                              | 1      |
| 5                                             | SQL | SELECT Count(*) As result from [output_read_withcode] WHERE actual_happ=TRUE And important=TRUE;                                             | result |
| Read actually happened                        |     |                                                                                                                                              | 14     |
| 6                                             | SQL | SELECT Count(*) As result from [output_read_withcode] WHERE type In("M","P","D") And actual_happ=TRUE and important=TRUE;                    | result |
| Read diagnoses actually happened              |     |                                                                                                                                              | 7      |
| 7                                             | SQL | SELECT Count(*) As result from [output_read_withcode] WHERE actual_happ=TRUE AND auto_happ=TRUE And important=TRUE;                          | result |
| Read actually happened and detected           |     |                                                                                                                                              | 14     |
| 8                                             | SQL | SELECT Count(*) As result from [output_read_withcode] WHERE type In("M","P","D") And actual_happ=TRUE And important=TRUE AND auto_happ=TRUE; | result |
| Read diagnoses actually happened and detected |     |                                                                                                                                              | 7      |
| 9                                             | SQL | SELECT Count(*) As result from [output_read_withcode] WHERE auto_happ=TRUE And important=TRUE;                                               | result |
| Read detected                                 |     |                                                                                                                                              | 15     |

Record: 1 of 36

Figure 10: Reports form

**description** Description of the outcome variable

The ‘reports’ report displays the ID, description and results from the **reports** table, in a format suitable for printing. When the report is opened, it prompts for analysis options and a description of the test sample, which are then displayed in the report.

## 8. Program development

### 8.1. Background

A computer program (**freetext3.mdb**) was developed to extract structured information from free text entries associated with death entries. The output was in the form of Read Clinical Terms with an associated context flag denoting the death certificate category of the diagnosis, or whether it was due to another condition, whether it was uncertain (‘query’) or negative or referred to someone other than the patient (‘family’). Dates and times were also extracted. The algorithm was tested on a random sample of texts containing 625 diagnoses, and it converted 86% to the correct Read Term and context flag.

## 8.2. Further development

The program was further developed in July-November 2005 for use with other types of free text and extract information on referrals and hospitalisations. This documentation refers to the most updated version of the program: freetext10.mdb.

## 8.3. Major changes

### 8.3.1. Information extracted

Symptoms, examination findings, tobacco and alcohol consumption, immunisations, hospitalisation and referrals. (Therapeutic procedures and contraception are currently not converted to Read terms).

### 8.3.2. User interface

Forms re-designed for ease of use, and to make it easy to view the intermediate results of analysis, and add attribute patterns and synonyms to increase accuracy in the future.

### 8.3.3. Changes made to increase speed

1. All tables are now loaded into RAM before analysis. Lists are searched using direct reference to sorted lists held in arrays, rather than using SQL to access the database tables. A further change made in Jan 2006 was to export all the lookup tables to a text file, which is quicker to load and makes it quicker to analyse a single text. It will also make it possible to produce an 'end-user' version of the program which does not use database tables at all. The text file has to be regenerated after making any changes to the tables.
2. A new table 'doublewords' was added, which consists of all pairs of two words which appear in Read terms, and their associated termref Uids. Previously the program would generate a set of termref Uids from each individual word, and then calculate the intersection of the two sets in order to generate the list of termref Uids present in both words.
3. The old wordlist table was renamed 'singlewords'. A new 'wordlist' table was generated which contained just a list of all the words in the Read terms, and was used for initial spelling correction.
4. A modified function enabling single character spelling mistakes in long words to be corrected.

# Part II.

## GUIDE TO VISUAL BASIC CODE

The source code and lookup tables are currently available on request from the authors but we aim to make them available on the internet. The program is licensed under the GNU General Public License Version 3. The Visual Basic documentation was produced using the 'Documentation' Visual Basic program (included with the source code for this project) which extracts comments, arguments and function calls from Visual Basic code and produces L<sup>A</sup>T<sub>E</sub>X documentation.

### 9. Module `freetext_core`

*Main subs and functions for the program*

#### 9.1. Global variables and constants

Const `wordmatchthreshold` = 0.73 (*used by readscore*)

`debug_string` – String (*stores analysis report for an individual text, when running in debug mode*)

`death` – Boolean (*whether Read term implies death*)

`gest` – Boolean (*whether Read term refers to weeks gestation*)

`spell` – Boolean (*whether to use spelling correction*)

#### 9.2. Sub `init_all`

*Initialises all the arrays from the data text file. If filepath is not provided, it is obtained from the table 'file\_location'. Arrays must be loaded in the same array that they are saved in the file.*

**Arguments:** `filepath` – String (Optional)

**Subs and functions called:** `attrib.infile` subsection 10.3 on page 50

`synonym.infile` subsection 15.2 on page 71

`wordlist.infile` subsection 17.2 on page 77

`terms.infile` subsection 16.2 on page 75

`checkterms.infile` subsection 11.3 on page 52

`freetext_core.outfile_all` subsection 9.3 on page 46

**Called by:** `in_out.filepath` subsection 18.1 on page 83

`in_out.do_input_table` subsection 18.5 on page 84

`in_out.do_text_file` subsection 18.7 on page 85

### 9.3. Function `outfile_all` As Boolean

*Initialise all arrays from database tables, and (if `dont_export` is False or not given) save them to a text file. The text file is specified in the table `file_location`, with the [file type] of 'Wordlist'. The value returned is whether or not the new file was successfully generated*

**Arguments:** `filepath` – String (Optional)

`dont_export` – Boolean (Optional)

**Subs and functions called:** `attrib.init` subsection 10.2 on page 50

`synonym.init` subsection 15.4 on page 71

`wordlist.init` subsection 17.4 on page 78

`terms.init` subsection 16.4 on page 75

`checkterms.init` subsection 11.2 on page 52

`attrib.outfile` subsection 10.4 on page 51

`synonym.outfile` subsection 15.3 on page 71

`wordlist.outfile` subsection 17.3 on page 77

`terms.outfile` subsection 16.3 on page 75

`checkterms.outfile` subsection 11.4 on page 52

**Called by:** `freetext_core.init_all` subsection 9.2 on page 45

`maintenance.make_wordlist` subsection 19.10 on page 88

### 9.4. Sub `main_termref`

*if `append = True`, text is appended to Read term (to appear as it would on the doctor's computer)*

**Arguments:** `instr` – String

`Termref` – Long

`spell_` – Boolean (Optional)

`debug_` – Boolean (Optional)

`append_term` – Boolean (Optional) (ByVal)

**Subs and functions called:** `terms.read_type` subsection 16.7 on page 76

`terms.std_term` subsection 16.8 on page 76

`strfunc.in_set` subsection 14.5 on page 66

`freetext_core.main` subsection 9.5 on page 47

`pd.mean` subsection 13.10 on page 59

`strfunc.dissect2` subsection 14.13 on page 69

`pd.Attr` subsection 13.9 on page 59

`pd.remove` subsection 13.24 on page 63

**Called by:** `in_out.filepath` subsection 18.1 on page 83

`in_out.do_input_table` subsection 18.5 on page 84

`in_out.do_text_file` subsection 18.7 on page 85

## 9.5. Sub main

*Main analysis, using all the options*

**Arguments:** `instring` – String (ByVal)

`death_` – Boolean (Optional)

`pregnant_` – Boolean (Optional)

`debug_` – Boolean (Optional)

`labtest` – String (Optional)

`spell_` – Boolean (Optional)

`date_only` – Boolean (Optional)

`termstring` – String (Optional)

`append_term` – Boolean (Optional)

`sicknote` – Boolean (Optional)

**Subs and functions called:** `freetext_core.readscore` subsection 9.10 on page 49

`wordlist.remove_ignore_phrases` subsection 17.23 on page 82

`pd.init_read` subsection 13.21 on page 63

`freetext_core.initial_search` subsection 9.6 on page 47

`attrib.pd_search2` subsection 10.6 on page 51

`pd.show_all_2` subsection 13.7 on page 58

`freetext_core.attrib_search` subsection 9.7 on page 48

`freetext_core.analyse_pd` subsection 9.8 on page 48

`pd.compress` subsection 13.4 on page 58

`pd.check_compressed` subsection 13.2 on page 57

`checkterms.check_all` subsection 11.5 on page 52

**Called by:** `freetext_core.main_termref` subsection 9.4 on page 46

`in_out.filepath` subsection 18.1 on page 83

`in_out.do_input_table` subsection 18.5 on page 84

`in_out.do_text_file` subsection 18.7 on page 85

## 9.6. Sub initial\_search

*tested 3 Jan 03; analyses pd for Read terms, synonyms, attributes and dates*

**Arguments:** `debug_` – Boolean (Optional)

**Subs and functions called:** `pd.max` subsection 13.28 on page 64

`pd.part_nopunc` subsection 13.16 on page 61

`strfunc.get_date` subsection 14.2 on page 65

`pd.part_punc_nospace` subsection 13.17 on page 61

`pd.add_mean` subsection 13.15 on page 61

`synonym.get_search_summary` subsection 15.8 on page 72

`pd.text` subsection 13.25 on page 64

`wordlist.ignorable` subsection 17.20 on page 82

**pd.add\_attr** subsection 13.14 on page 60  
**strfunc.is\_numeric** subsection 14.14 on page 70  
**wordlist.wordsearch** subsection 17.19 on page 81  
**pd.set\_text** subsection 13.26 on page 64

**Called by:** **freetext\_core.main** subsection 9.5 on page 47

## 9.7. Sub attrib\_search

*now assign attributes to actual read terms, dates etc.*

**Arguments:** **debug\_** – Boolean (Optional)

**Subs and functions called:** **pd.max** subsection 13.28 on page 64

**pd.Attr** subsection 13.9 on page 59  
**strfunc.in\_set** subsection 14.5 on page 66  
**pd.mean** subsection 13.10 on page 59  
**pd.text** subsection 13.25 on page 64  
**pd.punct** subsection 13.27 on page 64  
**pd.set\_attr** subsection 13.12 on page 60

**Called by:** **freetext\_core.main** subsection 9.5 on page 47

## 9.8. Sub analyse\_pd

*analyses pd after the initial search; attempts to convert terms into readcodes.*

**Arguments:** **debug\_** – Boolean (Optional)

**labtest** – String (Optional)

**Subs and functions called:** **strfunc.in\_set** subsection 14.5 on page 66

**pd.mean** subsection 13.10 on page 59  
**pd.Attr** subsection 13.9 on page 59  
**pd.max** subsection 13.28 on page 64  
**pd.punct** subsection 13.27 on page 64  
**pd.text** subsection 13.25 on page 64  
**list.bestmatch** subsection 12.3 on page 54  
**pd.set\_mean** subsection 13.13 on page 60  
**strfunc.words** subsection 14.4 on page 66  
**pd.set\_attr** subsection 13.12 on page 60

**Called by:** **freetext\_core.main** subsection 9.5 on page 47



## 9.9. Function `remove_ignorable As String`

*modified sep 04 and Oct 05. Removes ignorable words from a phrase. Requires one space between words; no punctuation*

**Arguments:** `instring` – String (ByVal)  
`remove_right_left` – Boolean (Optional)

**Subs and functions called:** `strfunc.numwords` subsection 14.7 on page 67  
`strfunc.dissect2` subsection 14.13 on page 69  
`wordlist.ignorable` subsection 17.20 on page 82  
`strfunc.in_set` subsection 14.5 on page 66

**Called by:** `list.getlist` subsection 12.8 on page 56  
`synonym.add` subsection 15.6 on page 72

## 9.10. Function `readscore As Single`

*produces a score based on the accuracy and completeness of match between free text (from partdata) and candidate Read term. Score between 0 and 100*

**Arguments:** `pd_start` – Long  
`pd_fin` – Long  
`Termref` – Long  
`debug_` – Boolean (Optional)  
`clear_memory` – Boolean (Optional)

**Subs and functions called:** `terms.std_term` subsection 16.8 on page 76  
`strfunc.numwords` subsection 14.7 on page 67  
`pd.part_nopunc` subsection 13.16 on page 61  
`terms.attrib_str` subsection 16.9 on page 76  
`pd.Attr` subsection 13.9 on page 59  
`strfunc.dissect2` subsection 14.13 on page 69  
`synonym.trylink_2` subsection 15.9 on page 73  
`strfunc.words` subsection 14.4 on page 66  
`pd.text` subsection 13.25 on page 64  
`pd.true_` subsection 13.8 on page 59  
`strfunc.in_set` subsection 14.5 on page 66  
`wordlist.ignorable` subsection 17.20 on page 82

**Called by:** `freetext_core.main` subsection 9.5 on page 47  
`list.getlist` subsection 12.8 on page 56

## 9.11. Function fuzzylink As Long

*Whether the two words are almost the same (maximum one character difference). Assume the first character is the same and they differ in length by at most 1. Gives a score (letter position of difference, zero if too different)*

**Arguments:** `ref_word` – String  
`test_word` – String

**Subs and functions called:** none

**Called by:** `wordlist.wordsearch` subsection 17.19 on page 81

## 10. Module attrib

### 10.1. Global variables and constants

Const `maxattrib` = 400  
`w(5, maxattrib)` – String  
`p(5, maxattrib)` – String  
`a(5, maxattrib)` – String  
`death_only(maxattrib)` – Boolean  
`numwd(maxattrib)` – Long  
`order(maxattrib)` – Long (*for debug purposes only*)  
`num` – Integer

### 10.2. Sub init

*initialises arrays for attribute search*

**Arguments:** none

**Subs and functions called:** `attrib.dissect2_options` subsection 10.5 on page 51

**Called by:** `freetext_core.outfile_all` subsection 9.3 on page 46

### 10.3. Sub infile

*Inputs everything from filename 1*

**Arguments:** none

**Subs and functions called:** none

**Called by:** `freetext_core.init_all` subsection 9.2 on page 45

## 10.4. Sub outfile

*Outputs arrays to filename 1*

**Arguments:** none

**Subs and functions called:** none

**Called by:** `freetext_core.outfile_all` subsection 9.3 on page 46

## 10.5. Function dissect2\_options As String

*Counts the options and puts it at the front for future use by the dissect2 function when using these words: i.e. 3\word\another\option. Modified 25-oct-05 to do this for ALL words, not only those with options (e.g. if any option it will be 1\thing ).*

**Arguments:** `instr` – String

**Subs and functions called:** none

**Called by:** `attrib.init` subsection 10.2 on page 50

## 10.6. Sub pd\_search2

*Death=true means include death certificate terms. New search strategy - by attrib term rather than by word in original text. Searches pd using attrib2 table; results are added to attribute fields of pd*

**Arguments:** `debug_` – Boolean (Optional)

`death` – Boolean (Optional)

**Subs and functions called:** `pd.max` subsection 13.28 on page 64

`pd.matchpattern` subsection 13.18 on page 62

`pd.set_attr` subsection 13.12 on page 60

`pd.set_mean` subsection 13.13 on page 60

`strfunc.dissect2` subsection 14.13 on page 69

`pd.text` subsection 13.25 on page 64

`pd.part_punc_nospace` subsection 13.17 on page 61

**Called by:** `freetext_core.main` subsection 9.5 on page 47

## 11. Module checkterms

*Added October 2005. Checks for occurrence (or not) of words in the text to validate or invalidate some termrefs*

## 11.1. Global variables and constants

Const **maxcheckterms** = 100

**Termref**(maxcheckterms) – String

**Qualify**(maxcheckterms) – String

**Dequalify**(maxcheckterms) – String

**used** – Long (*number of entries*)

## 11.2. Sub init

*Loads entries from checkterms table into arrays*

**Arguments:** none

**Subs and functions called:** none

**Called by:** **freetext\_core.outfile\_all** subsection 9.3 on page 46

## 11.3. Sub infile

*Inputs everything from filename 1*

**Arguments:** none

**Subs and functions called:** none

**Called by:** **freetext\_core.init\_all** subsection 9.2 on page 45

## 11.4. Sub outfile

*Outputs arrays to filename 1*

**Arguments:** none

**Subs and functions called:** none

**Called by:** **freetext\_core.outfile\_all** subsection 9.3 on page 46

## 11.5. Sub check\_all

*Carries out the actual checking*

**Arguments:** **checkstring** – String

**debug\_** – Boolean (Optional)

**sicknote** – Boolean (Optional)

**death** – Boolean (Optional)

**date\_only** – Boolean (Optional)

**Subs and functions called:** `pd.max` subsection 13.28 on page 64

`pd.mean` subsection 13.10 on page 59

`pd.set_attr` subsection 13.12 on page 60

`pd.Attr` subsection 13.9 on page 59

`pd.remove` subsection 13.24 on page 63

`strfunc.dissect2` subsection 14.13 on page 69

`checkterms.in_list` subsection 11.6 on page 53

`checkterms.if_qualify` subsection 11.7 on page 53

`checkterms.if_dequalify` subsection 11.8 on page 53

**Called by:** `freetext_core.main` subsection 9.5 on page 47

## 11.6. Function `in_list` As Long

*returns the position of the termref in the table*

**Arguments:** `in_termref` – Long

**Subs and functions called:** none

**Called by:** `checkterms.check_all` subsection 11.5 on page 52

`list.expand` subsection 12.4 on page 54

`list.display` subsection 12.6 on page 55

## 11.7. Function `if_qualify` As Boolean

*whether one of the qualifying terms is present in the text*

**Arguments:** `pos` – Long

`checkstring` – String

**Subs and functions called:** `strfunc.dissect2` subsection 14.13 on page 69

**Called by:** `checkterms.check_all` subsection 11.5 on page 52

## 11.8. Function `if_dequalify` As Boolean

*whether one of the dequalifying terms is present in the text*

**Arguments:** `pos` – Long

`checkstring` – String

**Subs and functions called:** `strfunc.dissect2` subsection 14.13 on page 69

**Called by:** `checkterms.check_all` subsection 11.5 on page 52

## 12. Module list

### 12.1. User-defined data types

#### **termlist**

Data elements:

**Termref(maxtermlist)** – Long

**words(maxtermlist)** – String

**score(maxtermlist)** – Single (*added 15 Jan 2004*)

**num** – Long (*number of terms in termlist*)

### 12.2. Global variables and constants

Const **maxtermlist** = 50 (*maximum number of terms to consider*)

Const **threshold\_high** = 91 (*(for readscore - don't analyse further)*)

Const **threshold** = 87 (*(for readscore - minimum)*)

### 12.3. Function bestmatch As String

*modified 31 Jan 06. Output is the termref of the best Read term match and associated readscore*

**Arguments:** **pd\_start** – Long

**pd\_fin** – Long

**debug\_** – Boolean (Optional)

**Subs and functions called:** **terms.exact\_read\_termref** subsection 16.6 on page 75

**pd.part\_nopunc** subsection 13.16 on page 61

**pd.text** subsection 13.25 on page 64

**list.getlist** subsection 12.8 on page 56

**list.display** subsection 12.6 on page 55

**list.expand** subsection 12.4 on page 54

**Called by:** **freetext\_core.analyse\_pd** subsection 9.8 on page 48

### 12.4. Function expand As termlist

*For each term in in\_list, generate a new term by using abbreviations or synonyms Search maximum 5 words at a time, starting with longer matches can expand from s1->s2 but not the other way round because s1 words might be more specific*

**Arguments:** **in\_list** – termlist

**pd\_start** – Long (Optional)

**pd\_fin** – Long (Optional)

**leeway** – Long (Optional)

**Subs and functions called:** `checkterms.in_list` subsection 11.6 on page 53

`strfunc.numwords` subsection 14.7 on page 67

`strfunc.words` subsection 14.4 on page 66

`synonym.s1_pos` subsection 15.11 on page 73

`synonym.s1_priority` subsection 15.14 on page 74

`synonym.s2` subsection 15.13 on page 74

`list.getlist` subsection 12.8 on page 56

`list.add_termlists` subsection 12.7 on page 55

`synonym.s1` subsection 15.13 on page 74

**Called by:** `list.bestmatch` subsection 12.3 on page 54

## 12.5. Sub test

**Arguments:** `phrase` – String

`pd_start` – Long (Optional)

`pd_fin` – Long (Optional)

`leeway` – Long (Optional)

**Subs and functions called:** `pd.max` subsection 13.28 on page 64

`wordlist.init` subsection 17.4 on page 78

`terms.init` subsection 16.4 on page 75

`pd.init_read` subsection 13.21 on page 63

`list.display` subsection 12.6 on page 55

`list.getlist` subsection 12.8 on page 56

**Called by:** `in_out.filepath` subsection 18.1 on page 83

## 12.6. Sub display

*writes the contents of termlist to the debug window*

**Arguments:** `in_list` – termlist

**Subs and functions called:** `checkterms.in_list` subsection 11.6 on page 53

`in_out.read_term` subsection 18.3 on page 83

**Called by:** `list.bestmatch` subsection 12.3 on page 54

`list.test` subsection 12.5 on page 55

## 12.7. Function add\_termlists As termlist

**Arguments:** `t1` – termlist

`t2` – termlist

**Subs and functions called:** none

**Called by:** `list.expand` subsection 12.4 on page 54

## 12.8. Function `getlist As termlist`

*If no words retrieved, try with left/right removed (AFTERWARDS). Modified 20JUN05 so it does not use database tables. Leeway is either zero or 1 (if it is OK to select terms which have one more word than 'words') – now only using leeway=0 (sub bestmatch modified) Removal of ignorable words – this should be checked using `remove_ignorable` prior to using this function*

**Arguments:** `words` – String (ByVal)

`pd_start` – Long (Optional)

`pd_fin` – Long (Optional)

`leeway` – Long (Optional)

**Subs and functions called:** `freetext_core.remove_ignorable` subsection 9.9 on page 49

`strfunc.numwords` subsection 14.7 on page 67

`wordlist.pos_singlewords` subsection 17.10 on page 79

`wordlist.pos_doublewords` subsection 17.11 on page 79

`freetext_core.readscore` subsection 9.10 on page 49

`wordlist.wordlist_termref` subsection 17.15 on page 80

`strfunc.words` subsection 14.4 on page 66

`wordlist.dbl_termref` subsection 17.13 on page 80

`wordlist.termref_in_doublewords1` subsection 17.18 on page 81

`wordlist.termref_in_doublewords2` subsection 17.18 on page 81

**Called by:** `list.bestmatch` subsection 12.3 on page 54

`list.expand` subsection 12.4 on page 54

`list.test` subsection 12.5 on page 55

## 12.9. Function `wordtermrefs_count As Long`

**Arguments:** `word` – String

**Subs and functions called:** `wordlist.pos_singlewords` subsection 17.10 on page 79

**Called by:** none

## 13. Module `pd`

*Partdata module. Similar to the old partdata module (used for the dosage analyser) but it stores punctuation separately and there is an extra section for attributes*



## 13.1. Global variables and constants

Const **maxpartdata** = 1000

**partdata\_used** – Long

**partdata(maxpartdata)** – String

**punc(maxpartdata)** – String (*punctuation*)

**attrib(maxpartdata)** – String (*attribute ' e.g. negative, family etc.*)

**meaning(maxpartdata)** – String (*meaning*)

## 13.2. Sub check\_compressed

*Use AFTER sub compress. If date\_only, removes all results except the first full date - NO LONGER, now if >1 date -> machinequery). Converts duration weeks and gestation into 'LABS' - gest Checks that only one gestational age. Checks that sysbp greater than diabbp. Checks that dateprev, datenext refer to a clinical event*

**Arguments:** **maybe\_pregnant** – Boolean (Optional)

**labtest** – String (Optional)

**Subs and functions called:** **strfunc.words** subsection 14.4 on page 66

**pd.Attr** subsection 13.9 on page 59

**pd.remove** subsection 13.24 on page 63

**pd.set\_attr** subsection 13.12 on page 60

**terms.true\_term** subsection 16.5 on page 75

**strfunc.dissect2** subsection 14.13 on page 69

**pd.set\_mean** subsection 13.13 on page 60

**strfunc.in\_set** subsection 14.5 on page 66

**pd.mean** subsection 13.10 on page 59

**pd.remove\_from\_compressed** subsection 13.3 on page 57

**Called by:** **freetext\_core.main** subsection 9.5 on page 47

## 13.3. Sub remove\_from\_compressed

*removes all entries with a certain attribute (lmp etc.) if there is a risk it might be wrong.*

**Arguments:** **attr\_to\_remove** – String (Optional) (ByVal)

**type\_to\_remove** – String (Optional) (ByVal)

**Subs and functions called:** **pd.remove** subsection 13.24 on page 63

**strfunc.dissect2** subsection 14.13 on page 69

**pd.mean** subsection 13.10 on page 59

**Called by:** **pd.check\_compressed** subsection 13.2 on page 57

## 13.4. Sub compress

*Converts pd into a single list of entries. Used at the end of interpretation.*

**Arguments:** none

**Subs and functions called:** `pd.Attr` subsection 13.9 on page 59

`strfunc.in_set` subsection 14.5 on page 66

`pd.mean` subsection 13.10 on page 59

`pd.set_mean` subsection 13.13 on page 60

`pd.correct_attr` subsection 13.5 on page 58

`pd.set_attr` subsection 13.12 on page 60

`pd.remove` subsection 13.24 on page 63

**Called by:** `freetext_core.main` subsection 9.5 on page 47

## 13.5. Function correct\_attr As Boolean

*whether the attribute at this position is appropriate*

**Arguments:** `pos` – Long

**Subs and functions called:** `strfunc.dissect2` subsection 14.13 on page 69

`pd.mean` subsection 13.10 on page 59

`strfunc.in_set` subsection 14.5 on page 66

`pd.Attr` subsection 13.9 on page 59

**Called by:** `pd.compress` subsection 13.4 on page 58

## 13.6. Sub show\_all

*prints the whole of pd to the debug window - (not used 23jun05)*

**Arguments:** none

**Subs and functions called:** none

**Called by:** none

## 13.7. Sub show\_all\_2

*prints the whole of pd to the debug window*

**Arguments:** none

**Subs and functions called:** none

**Called by:** `freetext_core.main` subsection 9.5 on page 47

## 13.8. Function `true_` As Long)

**Arguments:** `pos` – Long

**Subs and functions called:** `pd.Attr` subsection 13.9 on page 59

**Called by:** `freetext_core.readscore` subsection 9.10 on page 49

## 13.9. Function `Attr` As String

**Arguments:** `pos` – Long

**Subs and functions called:** none

**Called by:** `freetext_core.main_termref` subsection 9.4 on page 46

`freetext_core.attrib_search` subsection 9.7 on page 48

`freetext_core.analyse_pd` subsection 9.8 on page 48

`freetext_core.readscore` subsection 9.10 on page 49

`checkterms.check_all` subsection 11.5 on page 52

`pd.check_compressed` subsection 13.2 on page 57

`pd.compress` subsection 13.4 on page 58

`pd.correct_attr` subsection 13.5 on page 58

`pd.true_` subsection 13.8 on page 59

`synonym.trylink_2` subsection 15.9 on page 73

`terms.init` subsection 16.4 on page 75

`in_out.results_output` subsection 18.6 on page 84

`in_out.do_text_file` subsection 18.7 on page 85

`maintenance.delete_long_terms` subsection 19.7 on page 88

`maintenance.make_wordlist` subsection 19.10 on page 88

`maintenance.process_termlist` subsection 19.15 on page 90

## 13.10. Function `mean` As String

**Arguments:** `pos` – Long

**Subs and functions called:** none

**Called by:** `freetext_core.main_termref` subsection 9.4 on page 46

`freetext_core.attrib_search` subsection 9.7 on page 48

`freetext_core.analyse_pd` subsection 9.8 on page 48

`checkterms.check_all` subsection 11.5 on page 52

`pd.check_compressed` subsection 13.2 on page 57

`pd.remove_from_compressed` subsection 13.3 on page 57

`pd.compress` subsection 13.4 on page 58

`pd.correct_attr` subsection 13.5 on page 58

**in\_out.results\_output** subsection 18.6 on page 84

**in\_out.do\_text\_file** subsection 18.7 on page 85

### 13.11. Sub del\_attr

**Arguments:** pos – Long

**Subs and functions called:** none

**Called by:** none

### 13.12. Sub set\_attr

```
Debug.Print "Set attribute: " partdata(pos) punc(pos) " " mean(pos) " " attr(pos) " -> "  
new_attribute If new_attribute <> "" Then Stop
```

**Arguments:** new\_attribute – String

pos – Long

**Subs and functions called:** none

**Called by:** freetext\_core.attrib\_search subsection 9.7 on page 48

freetext\_core.analyse\_pd subsection 9.8 on page 48

attrib.pd\_search2 subsection 10.6 on page 51

checkterms.check\_all subsection 11.5 on page 52

pd.check\_compressed subsection 13.2 on page 57

pd.compress subsection 13.4 on page 58

### 13.13. Sub set\_mean

**Arguments:** new\_meaning – String

pos – Long

**Subs and functions called:** none

**Called by:** freetext\_core.analyse\_pd subsection 9.8 on page 48

attrib.pd\_search2 subsection 10.6 on page 51

pd.check\_compressed subsection 13.2 on page 57

pd.compress subsection 13.4 on page 58

### 13.14. Sub add\_attr

*if there is already an attribute of any type at this position, exit sub*

**Arguments:** `new_attribute` – String

`pos_start` – Long

`pos_fin` – Long (Optional)

`ignore_if_already` – Boolean (Optional)

**Subs and functions called:** none

**Called by:** `freetext_core.initial_search` subsection 9.6 on page 47

### 13.15. Sub `add_mean`

*if there is already an meaning of any type at this position, exit sub*

**Arguments:** `new_meaning` – String

`pos_start` – Long

`pos_fin` – Long (Optional)

`ignore_if_already` – Boolean (Optional)

**Subs and functions called:** none

**Called by:** `freetext_core.initial_search` subsection 9.6 on page 47

### 13.16. Function `part_nopunc` As String

*partdata text only (no punctuation)*

**Arguments:** `start` – Long (Optional)

`fin` – Long (Optional) (ByVal)

**Subs and functions called:** `pd.max` subsection 13.28 on page 64

**Called by:** `freetext_core.initial_search` subsection 9.6 on page 47

`freetext_core.readscore` subsection 9.10 on page 49

`list.bestmatch` subsection 12.3 on page 54

`synonym.trylink_2` subsection 15.9 on page 73

`maintenance.make_std_term_with_attr` subsection 19.5 on page 87

### 13.17. Function `part_punc_nospace` As String

*includes punctuation but no spaces either side of punctuation*

**Arguments:** `start` – Long

`fin` – Long

**Subs and functions called:** `pd.max` subsection 13.28 on page 64

**Called by:** `freetext_core.initial_search` subsection 9.6 on page 47

`attrib.pd_search2` subsection 10.6 on page 51

### 13.18. Function matchpattern As Boolean

*whether a set of up to 5 words or meanings (w1-w5) with punctuation (p1-p5) match a set of entries in partdata*

**Arguments:** `partdata_pos` – Long

`w1` – String  
`p1` – String  
`w2` – String  
`p2` – String  
`w3` – String  
`p3` – String  
`w4` – String  
`p4` – String  
`w5` – String  
`p5` – String

**Subs and functions called:** `pd.matchposition` subsection 13.19 on page 62

**Called by:** `attrib.pd_search2` subsection 10.6 on page 51

### 13.19. Function matchposition As Boolean

*word can represent either partdata text, or meaning if enclosed in [] modification 25-Oct-05 to allow different data types and punctuation to be separated by |*

**Arguments:** `partdata_pos` – Long

`word` – String (ByVal)  
`punct` – String (ByVal)

**Subs and functions called:** `strfunc.dissect2` subsection 14.13 on page 69

`pd.matchoption` subsection 13.20 on page 62

**Called by:** `pd.matchpattern` subsection 13.18 on page 62

### 13.20. Function matchoption As Boolean

*match meaning / words*

**Arguments:** `partdata_pos` – Long

`word` – String (ByVal)  
`punct` – String (ByVal)

**Subs and functions called:** `strfunc.dissect` subsection 14.13 on page 69

`strfunc.words` subsection 14.4 on page 66

`pd.text` subsection 13.25 on page 64

**Called by:** `pd.matchposition` subsection 13.19 on page 62

### 13.21. Sub `init_read`

*initialises partdata and punc using instring. also converts: + -> 'and', -> 'fracture'*

**Arguments:** `instring` – String

**Subs and functions called:** `pd.clear` subsection 13.23 on page 63

`pd.st_type` subsection 13.22 on page 63

`strfunc.is_numeric` subsection 14.14 on page 70

**Called by:** `freetext_core.main` subsection 9.5 on page 47

`list.test` subsection 12.5 on page 55

`maintenance.read_attribute` subsection 19.3 on page 86

`maintenance.make_std_term_with_attr` subsection 19.5 on page 87

### 13.22. Function `st_type` As Long

**Arguments:** `instring` – String

**Subs and functions called:** `strfunc.is_text` subsection 14.6 on page 67

`strfunc.is_numeric` subsection 14.14 on page 70

**Called by:** `pd.init_read` subsection 13.21 on page 63

### 13.23. Sub `clear`

**Arguments:** none

**Subs and functions called:** none

**Called by:** `pd.init_read` subsection 13.21 on page 63

### 13.24. Sub `remove`

*removes data from specified positions*

**Arguments:** `pos1` – Long

`pos2` – Long (Optional)

**Subs and functions called:** none

**Called by:** `freetext_core.main_termref` subsection 9.4 on page 46

`checkterms.check_all` subsection 11.5 on page 52

`pd.check_compressed` subsection 13.2 on page 57

`pd.remove_from_compressed` subsection 13.3 on page 57

`pd.compress` subsection 13.4 on page 58

## 13.25. Function text As String

**Arguments:** `position` – Long

**Subs and functions called:** none

**Called by:** `freetext_core.initial_search` subsection 9.6 on page 47

`freetext_core.attrib_search` subsection 9.7 on page 48

`freetext_core.analyse_pd` subsection 9.8 on page 48

`freetext_core.readscore` subsection 9.10 on page 49

`attrib_pd_search2` subsection 10.6 on page 51

`list.bestmatch` subsection 12.3 on page 54

`pd.matchoption` subsection 13.20 on page 62

`wordlist.init_ignore` subsection 17.5 on page 78

`in_out.input_string` subsection 18.2 on page 83

`in_out.import_input_table` subsection 18.4 on page 84

`in_out.do_input_table` subsection 18.5 on page 84

## 13.26. Sub set\_text

**Arguments:** `new_text` – String

`position` – Long

**Subs and functions called:** none

**Called by:** `freetext_core.initial_search` subsection 9.6 on page 47

## 13.27. Function punct As String

**Arguments:** `position` – Long

**Subs and functions called:** none

**Called by:** `freetext_core.attrib_search` subsection 9.7 on page 48

`freetext_core.analyse_pd` subsection 9.8 on page 48

## 13.28. Function max As Long

**Arguments:** none

**Subs and functions called:** none

**Called by:** `freetext_core.initial_search` subsection 9.6 on page 47

`freetext_core.attrib_search` subsection 9.7 on page 48

`freetext_core.analyse_pd` subsection 9.8 on page 48

`attrib_pd_search2` subsection 10.6 on page 51



**checkterms.check\_all** subsection 11.5 on page 52  
**list.test** subsection 12.5 on page 55  
**pd.part\_nopunc** subsection 13.16 on page 61  
**pd.part\_punc\_nospace** subsection 13.17 on page 61  
**pd.part\_punc** subsection 13.29 on page 65  
**in\_out.results\_output** subsection 18.6 on page 84  
**in\_out.do\_text\_file** subsection 18.7 on page 85

## 13.29. Function **part\_punc** As String

*includes punctuation with a space either side of punctuation*

**Arguments:** **start** – Long  
**fin** – Long

**Subs and functions called:** **pd.max** subsection 13.28 on page 64

**Called by:** **maintenance.read\_attribute** subsection 19.3 on page 86

## 14. Module **strfunc**

*Various functions for manipulating strings*

### 14.1. Global variables and constants

Const **max\_wd** = 30

### 14.2. Function **get\_date** As String

*attempts to convert a string into a date*

**Arguments:** **s** – String  
**get\_time** – Boolean (Optional)

**Subs and functions called:** **strfunc.in\_set** subsection 14.5 on page 66  
**strfunc.dissect2** subsection 14.13 on page 69  
**strfunc.get\_date\_average** subsection 14.3 on page 66

**Called by:** **freetext\_core.initial\_search** subsection 9.6 on page 47

### 14.3. Function `get_date_average` As String

*provides a replacement for first number (s1) from phrases such as 2-3 weeks, 5-6 days etc. average duration is used, rounded UP (no decimal places).*

**Arguments:** `s1` – String  
`s2` – String

**Subs and functions called:** none

**Called by:** `strfunc.get_date` subsection 14.2 on page 65

### 14.4. Function `words` As String

*tested 31 dec 03 assume one space between words, and no spaces at the beginning*

**Arguments:** `phrase` – String (ByVal)  
`start` – Long  
`numwd` – Long (Optional)  
`finish` – Long (Optional)

**Subs and functions called:** `strfunc.dissect2` subsection 14.13 on page 69  
`strfunc.numwords` subsection 14.7 on page 67

**Called by:** `freetext_core.analyse_pd` subsection 9.8 on page 48  
`freetext_core.readscore` subsection 9.10 on page 49  
`list.expand` subsection 12.4 on page 54  
`list.getlist` subsection 12.8 on page 56  
`pd.check_compressed` subsection 13.2 on page 57  
`pd.matchoption` subsection 13.20 on page 62  
`synonym.trylink_2` subsection 15.9 on page 73  
`wordlist.init` subsection 17.4 on page 78  
`wordlist.pos_doublewords` subsection 17.11 on page 79  
`in_out.results_output` subsection 18.6 on page 84  
`in_out.do_text_file` subsection 18.7 on page 85  
`maintenance.read_attribute` subsection 19.3 on page 86  
`maintenance.make_wordlist` subsection 19.10 on page 88

### 14.5. Function `in_set` As Boolean

*whether target is one of a, b, c, d, e etc. stops when it encounters the first empty string*

**Arguments:** `Target` – String  
`a` – String  
`b` –  
`c` – String (Optional)  
`d` – String (Optional)

**e** – String (Optional)  
**f** – String (Optional)  
**g** – String (Optional)  
**h** – String (Optional)  
**i** – String (Optional)  
**j** – String (Optional)  
**k** – String (Optional)  
**l** – String (Optional)

**Subs and functions called:** none

**Called by:** `freetext_core.main_termref` subsection 9.4 on page 46

`freetext_core.attrib_search` subsection 9.7 on page 48

`freetext_core.analyse_pd` subsection 9.8 on page 48

`freetext_core.remove_ignorable` subsection 9.9 on page 49

`freetext_core.readscore` subsection 9.10 on page 49

`pd.check_compressed` subsection 13.2 on page 57

`pd.compress` subsection 13.4 on page 58

`pd.correct_attr` subsection 13.5 on page 58

`strfunc.get_date` subsection 14.2 on page 65

`strfunc.is_numeric` subsection 14.14 on page 70

`in_out.results_output` subsection 18.6 on page 84

## 14.6. Function `is_text` As Boolean

*lower case only*

**Arguments:** `instring` –

**Subs and functions called:** none

**Called by:** `pd.st_type` subsection 13.22 on page 63

`strfunc.phrase_match_pattern` subsection 14.15 on page 70

`maintenance.read_attribute` subsection 19.3 on page 86

## 14.7. Function `numwords` As Long

**Arguments:** `instring` – String (ByVal)

**Subs and functions called:** none

**Called by:** `freetext_core.remove_ignorable` subsection 9.9 on page 49

`freetext_core.readscore` subsection 9.10 on page 49

`list.expand` subsection 12.4 on page 54

`list.getlist` subsection 12.8 on page 56

`strfunc.words` subsection 14.4 on page 66

`strfunc.is_acronym` subsection 14.8 on page 68

**strfunc.phrase\_match\_pattern** subsection 14.15 on page 70

**synonym.add** subsection 15.6 on page 72

**synonym.add\_with\_acronym** subsection 15.7 on page 72

**synonym.trylink\_2** subsection 15.9 on page 73

**maintenance.read\_attribute** subsection 19.3 on page 86

## 14.8. Function **is\_acronym** As Boolean

*whether or not abbrev is an acronym of full abbrev can either have spaces or no spaces*

**Arguments:** **abbrev** – String (ByVal)

**full** – String

**Subs and functions called:** **strfunc.numwords** subsection 14.7 on page 67

**strfunc.dissect** subsection 14.13 on page 69

**Called by:** **synonym.add\_with\_acronym** subsection 15.7 on page 72

## 14.9. Function **all\_punc** As Boolean

*whether a string is entirely punctuation*

**Arguments:** **s** – String

**Subs and functions called:** none

**Called by:** none

## 14.10. Function **matchindex** As Single

*gives the percentage of larger word which smaller word matches*

**Arguments:** **word1** – String

**word2** – String

**Subs and functions called:** **strfunc.num\_diff\_char** subsection 14.11 on page 68

**Called by:** none

## 14.11. Function **num\_diff\_char** As Long

*tested 3 feb 04 counts the number of characters which are different between str1 and str2 only considers up to the length of the shorter string, and only up to 3 different*

**Arguments:** **str1** – String

**str2** – String

**Subs and functions called:** none

**Called by:** `strfunc.matchindex` subsection 14.10 on page 68

## 14.12. Function dissect As String

*rewritten 1-Oct-05 to use the VBA.split function via 'dissect2'. These functions are identical apart from the order of the arguments.*

**Arguments:** `in_string` – String  
          `number` – Long  
          `delimiter` – String (Optional)

**Subs and functions called:** `strfunc.dissect2` subsection 14.13 on page 69

**Called by:** `pd.matchoption` subsection 13.20 on page 62  
          `strfunc.is_acronym` subsection 14.8 on page 68  
          `in_out.import_input_table` subsection 18.4 on page 84  
          `in_out.do_text_file` subsection 18.7 on page 85

## 14.13. Function dissect2 As String

*if delimiter is not given it is assumed to be space*

**Arguments:** `in_string` – String  
          `delimiter` – String (Optional)  
          `number` – Long (Optional)

**Subs and functions called:** none

**Called by:** `freetext_core.main_termref` subsection 9.4 on page 46  
          `freetext_core.remove_ignorable` subsection 9.9 on page 49  
          `freetext_core.readscore` subsection 9.10 on page 49  
          `attrib.pd_search2` subsection 10.6 on page 51  
          `checkterms.check_all` subsection 11.5 on page 52  
          `checkterms.if_qualify` subsection 11.7 on page 53  
          `checkterms.if_dequalify` subsection 11.8 on page 53  
          `pd.check_compressed` subsection 13.2 on page 57  
          `pd.remove_from_compressed` subsection 13.3 on page 57  
          `pd.correct_attr` subsection 13.5 on page 58  
          `pd.matchposition` subsection 13.19 on page 62  
          `strfunc.get_date` subsection 14.2 on page 65  
          `strfunc.words` subsection 14.4 on page 66  
          `strfunc.dissect` subsection 14.13 on page 69  
          `strfunc.phrase_match_pattern` subsection 14.15 on page 70  
          `synonym.sl_priority` subsection 15.14 on page 74

**maintenance.read\_attribute** subsection 19.3 on page 86

**maintenance.process\_termlist** subsection 19.15 on page 90

## 14.14. Function **is\_numeric** As Boolean

*determines whether a string contains only a single number or part of a single number if lab\_results\_mode is TRUE, words like 'normal', 'abnormal' etc. are considered to be numbers.*

**Arguments:** **instring** – String

**lab\_results\_mode** – Boolean (Optional)

**Subs and functions called:** **strfunc.in\_set** subsection 14.5 on page 66

**Called by:** **freetext\_core.initial\_search** subsection 9.6 on page 47

**pd.init\_read** subsection 13.21 on page 63

**pd.st\_type** subsection 13.22 on page 63

## 14.15. Function **phrase\_match\_pattern** As Long

*Whether or not strings 1 and 2 match (word by word) - used by maintenance.rm\_attr =number, \*=text, ?=anything - for a whole word*

**Arguments:** **instring** – String

**pattern** – String

**Subs and functions called:** **strfunc.numwords** subsection 14.7 on page 67

**strfunc.dissect2** subsection 14.13 on page 69

**strfunc.is\_text** subsection 14.6 on page 67

**Called by:** **maintenance.rm\_attr** subsection 19.6 on page 87

## 15. Module synonym

*Priority codes: 5 = exact match (both ways) e.g. chronic obstructive pulmonary disease = copd; 4 = almost exact match (both ways) e.g. cancer = malignant neoplasm; 3 = moderate match (s1 is ) e.g. b pne = bronchopneumonia; e.g. carcinoma (is a type of) = malignant neoplasm; 2 = non-standard abbreviation or distorted form; possible one-way match (s2 wider than s1) e.g. rsi = repetitive strain injury; 1 = loosely associated (s2 wider than s1) e.g. foot (is a part of) = lower limb; -100 = opposite.*

## 15.1. Global variables and constants

Const **maxsynonym** = 2000

**s\_used** – Long

**s1\_sorted(maxsynonym)** – String

**s1\_result(maxsynonym)** – String (*priority and numwords, used for get\_search\_summary*)

**s1\_s2(maxsynonym)** – String (*not sorted*)

**s2\_sorted(maxsynonym)** – String (*first sort order*)

**s2\_s2num(maxsynonym)** – Long (*2nd sort desc*)

**s2\_s1num(maxsynonym)** – Long (*3rd sort desc*)

**s2\_priority(maxsynonym)** – String (*4th sort desc*)

**s2\_s1(maxsynonym)** – String (*not sorted*)

## 15.2. Sub infile

*Inputs everything from filename 1*

**Arguments:** none

**Subs and functions called:** none

**Called by:** **freetext\_core.init\_all** subsection 9.2 on page 45

## 15.3. Sub outfile

*Outputs arrays to filename 1*

**Arguments:** none

**Subs and functions called:** none

**Called by:** **freetext\_core.outfile\_all** subsection 9.3 on page 46

## 15.4. Sub init

*initialises synonym arrays*

**Arguments:** none

**Subs and functions called:** **synonym.s2** subsection 15.13 on page 74  
**synonym.s1** subsection 15.13 on page 74

**Called by:** **freetext\_core.outfile\_all** subsection 9.3 on page 46

## 15.5. Sub del

*deletes entry*

**Arguments:** **s1** – String (ByVal)  
              **s2** – String (ByVal)

**Subs and functions called:** none

**Called by:** none

## 15.6. Sub add

*adds a term to the synonym list updates priority if term already exists s1 and s2 are combined primary key - therefore there cannot be any duplicates*

**Arguments:** **s1** – String (ByVal)  
              **s2** – String (ByVal)  
              **priority** – Long (Optional)  
              **bothways** – Boolean (Optional)

**Subs and functions called:** **strfunc.numwords** subsection 14.7 on page 67  
                              **wordlist.init\_ignore** subsection 17.5 on page 78  
                              **freetext\_core.remove\_ignorable** subsection 9.9 on page 49

**Called by:** **synonym.add\_with\_acronym** subsection 15.7 on page 72

## 15.7. Sub add\_with\_acronym

*automatically add spaced-out version of acronym (e.g. mi would also add m i)*

**Arguments:** **s1** – String (ByVal)  
              **s2** – String (ByVal)  
              **priority** – Long (Optional)  
              **bothways** – Boolean (Optional)

**Subs and functions called:** **synonym.add** subsection 15.6 on page 72  
                              **strfunc.is\_acronym** subsection 14.8 on page 68  
                              **strfunc.numwords** subsection 14.7 on page 67

**Called by:** none

## 15.8. Function get\_search\_summary As String

*new version - requires arrays Call init ' for testing*

**Arguments:** **instring** – String



**Subs and functions called:** none

**Called by:** `freetext_core.initial_search` subsection 9.6 on page 47

## 15.9. Function `trylink_2` As String

*NEW VERSION tries to match a Read term segment to pd (between pd\_start and pd\_fin) starts from the beginning of the Read term segment; tries to match the whole of pd between pd\_start and pd\_fin, then tries to get the largest possible match. If not possible, tries smaller segments of the Read term but always starting from the beginning. OUTPUT: priority position\_within\_pd\_start position\_within\_pd\_fin read\_fin (space separated) MODIFIED 11 Dec 2005 to give an output with priority 6 if read\_term\_segment = pdstring*

**Arguments:** `read_term_segment` – String (ByVal)

`pd_start` – Long

`pd_fin` – Long

`cur_true` – Boolean

**Subs and functions called:** `pd.part_nopunc` subsection 13.16 on page 61

`strfunc.numwords` subsection 14.7 on page 67

`strfunc.words` subsection 14.4 on page 66

`pd.Attr` subsection 13.9 on page 59

`synonym.s2_pos` subsection 15.11 on page 73

**Called by:** `freetext_core.readscore` subsection 9.10 on page 49

## 15.10. Function `s2_pos` As Long

*Call init ' returns the first position of s2 text in s2 sorted list*

**Arguments:** `s2_text` – String

**Subs and functions called:** none

**Called by:** `synonym.trylink_2` subsection 15.9 on page 73

## 15.11. Function `s1_pos` As Long

*returns the first position of s1 text in s1 sorted list*

**Arguments:** `s1_text` – String

**Subs and functions called:** none

**Called by:** `list.expand` subsection 12.4 on page 54

## 15.12. Function s2 As String

**Arguments:** `s1_pos` – Long

**Subs and functions called:** none

**Called by:** `list.expand` subsection 12.4 on page 54  
`synonym.init` subsection 15.4 on page 71

## 15.13. Function s1 As String

**Arguments:** `s1_pos` – Long

**Subs and functions called:** none

**Called by:** `list.expand` subsection 12.4 on page 54  
`synonym.init` subsection 15.4 on page 71

## 15.14. Function s1\_priority As Long

**Arguments:** `s1_pos` – Long

**Subs and functions called:** `strfunc.dissect2` subsection 14.13 on page 69

**Called by:** `list.expand` subsection 12.4 on page 54

# 16. Module terms

*Contains the list of Read terms for the purposes of the program*

## 16.1. Global variables and constants

Const `max_usedterms` = 100000

Const `max_allterms` = 150000

`a_std_term(max_usedterms)` – String (table of `std_term` (ordered) to get `termref`)

`a_termref(max_usedterms)` – Long (table of `std_term` (ordered) to get `termref`)

`a_terms_used` – Long

`b_termref(max_allterms)` – Long (to get `std_term` or `attrib_str`. All `termrefs` included)

`b_std_term(max_allterms)` – String

`b_attrib_str(max_allterms)` – String

`b_type(max_allterms)` – String (data type of Read term (pregnancy, labtest, death etc.))

`b_terms_used` – Long

## 16.2. Sub infile

*Inputs everything from filename 1*

**Arguments:** none

**Subs and functions called:** none

**Called by:** `freetext_core.init_all` subsection 9.2 on page 45

## 16.3. Sub outfile

*Outputs arrays to filename 1*

**Arguments:** none

**Subs and functions called:** none

**Called by:** `freetext_core.outfile_all` subsection 9.3 on page 46

## 16.4. Sub init

**Arguments:** none

**Subs and functions called:** `terms.std_term` subsection 16.8 on page 76  
`pd.Attr` subsection 13.9 on page 59

**Called by:** `freetext_core.outfile_all` subsection 9.3 on page 46  
`list.test` subsection 12.5 on page 55  
`maintenance.delete_superfluous_terms` subsection 19.8 on page 88

## 16.5. Function true\_term As Boolean

*whether a term contains a true part*

**Arguments:** `Termref` – Long

**Subs and functions called:** `terms.attrib_str` subsection 16.9 on page 76

**Called by:** `pd.check_compressed` subsection 13.2 on page 57

## 16.6. Function exact\_read\_termref As Long

*attempts to find an exact match to Read (using std\_terms) – returns termref NB terms in std\_term column have spaces before and after the words*

**Arguments:** `search_term` – String

**Subs and functions called:** none

**Called by:** `list.bestmatch` subsection 12.3 on page 54

`maintenance.find_similar_term` subsection 19.9 on page 88

## 16.7. Function `read_type` As String

*returns the type code of the Read Term (whether pregnancy, death, labtest etc.)*

**Arguments:** `Termref` – Long

**Subs and functions called:** none

**Called by:** `freetext_core.main_termref` subsection 9.4 on page 46

## 16.8. Function `std_term` As String

*standardised term for a termref*

**Arguments:** `Termref` – Long

**Subs and functions called:** none

**Called by:** `freetext_core.main_termref` subsection 9.4 on page 46

`freetext_core.readscore` subsection 9.10 on page 49

`terms.init` subsection 16.4 on page 75

`maintenance.delete_superfluous_terms` subsection 19.8 on page 88

`maintenance.make_wordlist` subsection 19.10 on page 88

`maintenance.process_termlist` subsection 19.15 on page 90

`maintenance.expand_rightleft` subsection 19.16 on page 90

## 16.9. Function `attrib_str` As String

*attribute string for a termref*

**Arguments:** `Termref` – Long

**Subs and functions called:** none

**Called by:** `freetext_core.readscore` subsection 9.10 on page 49

`terms.true_term` subsection 16.5 on page 75

## 17. Module `wordlist`

*3 tables for rapid lookup*

## 17.1. Global variables and constants

Const **maxsingle** = 200000

Const **maxdouble** = 300000

Const **maxwords** = 100000

Const **maxignore** = 100

**s\_termref(maxsingle)** – Long

**s\_words(maxsingle)** – String

**s\_numwd(maxsingle)** – Byte

**s\_max** – Long

**d\_termref(maxdouble)** – Long

**d\_words(maxdouble)** – String

**d\_numwd(maxdouble)** – Byte

**d\_max** – Long

**w\_words(maxwords)** – String

**w\_clinical(maxwords)** – Boolean (*added 30jan06; whether the word is possibly part of a Clinical Term*)

**w\_top(40)** – Long (*start position for words of different lengths*)

**w\_max** – Long

**ignorelist(maxignore)** – String (*words which can be ignored e.g. if, and, of, the*)

**ignorelistnum** – Long

**ignorephrase(maxignore)** – String (*words which can be ignored e.g. if, and, of, the*)

**ignorephrasenum** – Long

## 17.2. Sub infile

*Inputs everything from filename 1*

**Arguments:** none

**Subs and functions called:** none

**Called by:** **freetext\_core.init\_all** subsection 9.2 on page 45

## 17.3. Sub outfile

*Outputs arrays to filename 1*

**Arguments:** none

**Subs and functions called:** none

**Called by:** **freetext\_core.outfile\_all** subsection 9.3 on page 46

## 17.4. Sub init

*initialises the wordlist arrays*

**Arguments:** none

**Subs and functions called:** `strfunc.words` subsection 14.4 on page 66  
`wordlist.init_ignore` subsection 17.5 on page 78

**Called by:** `freetext_core.outfile_all` subsection 9.3 on page 46  
`list.test` subsection 12.5 on page 55

## 17.5. Sub init\_ignore

*IGNORABLE LIST*

**Arguments:** none

**Subs and functions called:** `pd.text` subsection 13.25 on page 64

**Called by:** `synonym.add` subsection 15.6 on page 72  
`wordlist.init` subsection 17.4 on page 78  
`maintenance.init_read_attr_tables` subsection 19.2 on page 86  
`maintenance.process_termlist` subsection 19.15 on page 90

## 17.6. Function in\_wordlist As String

*returns CLIN or WORD depending whether the word is clinical whether a word is in the wordlist list (sorted by wordlength, then word)*

**Arguments:** `instring` – String

**Subs and functions called:** none

**Called by:** `wordlist.in_wordlist_OLD` subsection 17.7 on page 78  
`wordlist.wordsearch` subsection 17.19 on page 81

## 17.7. Function in\_wordlist\_OLD As Boolean

*whether a word is in the wordlist list (sorted by wordlength, then word)*

**Arguments:** `instring` – String

**Subs and functions called:** `wordlist.in_wordlist` subsection 17.7 on page 78

**Called by:** none

## 17.8. Function `approx_wordlist` As Long

*approximate position of a word in the wordlist list (sorted by wordlength, then word)*

**Arguments:** `instring` – String

**Subs and functions called:** none

**Called by:** `wordlist.wordsearch` subsection 17.19 on page 81

## 17.9. Function `pos_wordlist` As Long

*chooses either singlewords or doublewords depending on number of words in `instring` `instring` must contain either one or two words.*

**Arguments:** `search_top` – Boolean

`instring` – String

`min_numwd` – Long

`max_numwd` – Long

**Subs and functions called:** `wordlist.pos_doublewords` subsection 17.11 on page 79

`wordlist.pos_singlewords` subsection 17.10 on page 79

**Called by:** none

## 17.10. Function `pos_singlewords` As Long

*position of first or last termref in singlewords. If result zero, the word is not in singlewords `search_top = True` means look for the top one*

**Arguments:** `search_top` – Boolean

`instring` – String

`min_numwd` – Long

`max_numwd` – Long

**Subs and functions called:** none

**Called by:** `list.getlist` subsection 12.8 on page 56

`list.wordtermrefs_count` subsection 12.9 on page 56

`wordlist.pos_wordlist` subsection 17.9 on page 79

`wordlist.termref_in_singlewords` subsection 17.16 on page 81

## 17.11. Function `pos_doublewords` As Long

*position of first or last termref in doublewords. If result zero, the word is not in doublewords `search_top = True` means look for the top one*

**Arguments:** `search_top` – Boolean

`instring` – String (ByVal)

`min_numwd` – Long

`max_numwd` – Long

**Subs and functions called:** `strfunc.words` subsection 14.4 on page 66

**Called by:** `list.getlist` subsection 12.8 on page 56

`wordlist.pos_wordlist` subsection 17.9 on page 79

`wordlist.termref_in_doublewords1` subsection 17.18 on page 81

`wordlist.termref_in_doublewords2` subsection 17.18 on page 81

## 17.12. Function `sng_termref` As Long

**Arguments:** `pos` – Long

**Subs and functions called:** none

**Called by:** none

## 17.13. Function `dbl_termref` As Long

**Arguments:** `pos` – Long

**Subs and functions called:** none

**Called by:** `list.getlist` subsection 12.8 on page 56

## 17.14. Function `dbl_numwd` As Long

**Arguments:** `pos` – Long

**Subs and functions called:** none

**Called by:** none

## 17.15. Function `wordlist_termref` As Long

*if numwd greater than 1, uses doublewords dictionary*

**Arguments:** `pos` – Long

`numwd` – Long

**Subs and functions called:** none

**Called by:** `list.getlist` subsection 12.8 on page 56



## 17.16. Function `termref_in_singlewords` As Boolean

*Whether a termref appears in a defined list within singlewords top and bot must be at the top or bottom of a list with numwd*

**Arguments:** `Termref` – Long

`top` – Long

`bot` – Long

**Subs and functions called:** `wordlist.pos_singlewords` subsection 17.10 on page 79

**Called by:** none

## 17.17. Function `termref_in_doublewords1` As Boolean

*Whether a termref appears in a defined list within doublewords There are two copies of this function with different static variables, enabling fast searching with two different parts of the list. top and bot must be at the top or bottom of a list with numwd*

**Arguments:** `Termref` – Long

`top` – Long

`bot` – Long

**Subs and functions called:** `wordlist.pos_doublewords` subsection 17.11 on page 79

**Called by:** `list.getlist` subsection 12.8 on page 56

## 17.18. Function `termref_in_doublewords2` As Boolean

*Whether a termref appears in a defined list within doublewords top and bot must be at the top or bottom of a list with numwd*

**Arguments:** `Termref` – Long

`top` – Long

`bot` – Long

**Subs and functions called:** `wordlist.pos_doublewords` subsection 17.11 on page 79

**Called by:** `list.getlist` subsection 12.8 on page 56

## 17.19. Function `wordsearch` As String

*tries to convert a word into a standard form (or without spelling mistakes) which is in wordlist returns CLIN (for a clinical word) or WORD (for any other word) followed by the correctly spelled word blank if the spelling cannot be corrected*

**Arguments:** `word` – String (ByVal)

`do_spellcheck` – Boolean (Optional)

**Subs and functions called:** `wordlist.in_wordlist` subsection 17.7 on page 78

`wordlist.approx_wordlist` subsection 17.8 on page 79

`freetext_core.fuzzylink` subsection 9.11 on page 50

**Called by:** `freetext_core.initial_search` subsection 9.6 on page 47

## 17.20. Function ignorable As Boolean

*whether or not a word is in the ignorable list for Read matching*

**Arguments:** `instring` – String

**Subs and functions called:** none

**Called by:** `freetext_core.initial_search` subsection 9.6 on page 47

`freetext_core.remove_ignorable` subsection 9.9 on page 49

`freetext_core.readscore` subsection 9.10 on page 49

`maintenance.read_attribute` subsection 19.3 on page 86

## 17.21. Function ignore\_max As ignore\_max()

**Arguments:** none

**Subs and functions called:** none

**Called by:** `maintenance.read_attribute` subsection 19.3 on page 86

## 17.22. Function ignore\_words As String

**Arguments:** `pos` – Long

**Subs and functions called:** none

**Called by:** `maintenance.read_attribute` subsection 19.3 on page 86

## 17.23. Function remove\_ignore\_phrases As String

*removes phrases which are found in 'ignorable' list*

**Arguments:** `instring` – String

**Subs and functions called:** `wordlist.initial_process` subsection 17.24 on page 83

**Called by:** `freetext_core.main` subsection 9.5 on page 47  
    `maintenance.read_attribute` subsection 19.3 on page 86  
    `maintenance.make_std_term_with_attr` subsection 19.5 on page 87

## 17.24. Function `initial_process` As String

*pasting result of cervical smear*

**Arguments:** `instring` – String

**Subs and functions called:** none

**Called by:** `wordlist.remove_ignore_phrases` subsection 17.23 on page 82

## 18. Module `in_out`

### 18.1. Function `filepath` As `filepath()`

*Modified test program 02/06/04 - analyses a single text. Uses input and output tables*

**Arguments:** none

**Subs and functions called:** `list.test` subsection 12.5 on page 55  
    `in_out.input_string` subsection 18.2 on page 83  
    `freetext_core.init_all` subsection 9.2 on page 45  
    `freetext_core.main` subsection 9.5 on page 47  
    `freetext_core.main_termref` subsection 9.4 on page 46  
    `in_out.results_output` subsection 18.6 on page 84

**Called by:** none

### 18.2. Function `input_string` As String

**Arguments:** `id` – Long

**Subs and functions called:** `pd.text` subsection 13.25 on page 64

**Called by:** `in_out.filepath` subsection 18.1 on page 83

### 18.3. Function `read_term` As String

*returns the actual Read or OXMIS term (not `std_term`) for a `termref`*

**Arguments:** `Termref` – Long

**Subs and functions called:** none

**Called by:** `list.display` subsection 12.6 on page 55  
`in_out.results_output` subsection 18.6 on page 84

## 18.4. Sub `import_input_table`

*imports texts from a tab delimited table id, text (no text qualifier; no header row) deletes current input and output table*

**Arguments:** `filepath` – String

`text_col` – Long

`id_col` – Long (Optional)

`delimiter` – String (Optional)

`termref_col` – Long (Optional)

`has_header` – Boolean (Optional)

**Subs and functions called:** `strfunc.dissect` subsection 14.13 on page 69  
`pd.text` subsection 13.25 on page 64

**Called by:** none

## 18.5. Sub `do_input_table`

*death, pregnancy are negative*

**Arguments:** `with_termref` – Boolean (Optional)

`death_` – Boolean (Optional)

`pregnant_` – Boolean (Optional)

`debug_` – Boolean (Optional)

`append` – Boolean (Optional)

`labtest` – String (Optional)

`date_only` – Boolean (Optional)

`sicknote` – Boolean (Optional)

**Subs and functions called:** `freetext_core.init_all` subsection 9.2 on page 45  
`freetext_core.main_termref` subsection 9.4 on page 46  
`pd.text` subsection 13.25 on page 64  
`freetext_core.main` subsection 9.5 on page 47  
`in_out.results_output` subsection 18.6 on page 84

**Called by:** none

## 18.6. Sub `results_output`

*places the results in the output table*

**Arguments:** `id` – Long  
`debug_` – Boolean

**Subs and functions called:** `pd.max` subsection 13.28 on page 64  
`strfunc.words` subsection 14.4 on page 66  
`pd.mean` subsection 13.10 on page 59  
`in_out.read_term` subsection 18.3 on page 83  
`pd.Attr` subsection 13.9 on page 59  
`strfunc.in_set` subsection 14.5 on page 66

**Called by:** `in_out.filepath` subsection 18.1 on page 83  
`in_out.do_input_table` subsection 18.5 on page 84

## 18.7. Sub `do_text_file`

*death, pregnancy are negative*

**Arguments:** `infile` – String  
`outfile` – String  
`id_col` – Long  
`text_col` – Long  
`delimiter` – String (Optional)  
`has_header` – Boolean (Optional)  
`termref_col` – Long (Optional)  
`death_` – Boolean (Optional)  
`pregnant_` – Boolean (Optional)  
`append` – Boolean (Optional)  
`labtest` – String (Optional)  
`date_only` – Boolean (Optional)  
`sicknote` – Boolean (Optional)

**Subs and functions called:** `freetext_core.init_all` subsection 9.2 on page 45  
`strfunc.dissect` subsection 14.13 on page 69  
`freetext_core.main_termref` subsection 9.4 on page 46  
`freetext_core.main` subsection 9.5 on page 47  
`pd.max` subsection 13.28 on page 64  
`strfunc.words` subsection 14.4 on page 66  
`pd.mean` subsection 13.10 on page 59  
`pd.Attr` subsection 13.9 on page 59

**Called by:** none

## 19. Module maintenance

### 19.1. Global variables and constants

**r1\_raw\_pattern(50)** – String (*read\_attr1 table, stored as arrays for faster processing*)  
**r1\_position(50)** – String  
**r1\_replacement(50)** – String  
**r1\_num** – Long  
**r2\_pattern(100)** – String (*read\_attr2 table, stored as arrays*)  
**r2\_attr(100)** – String  
**r2\_num** – Long

### 19.2. Sub init\_read\_attr\_tables

*imports all data from Read attribute tables into arrays*

**Arguments:** none

**Subs and functions called:** **wordlist.init\_ignore** subsection 17.5 on page 78

**Called by:** **maintenance.read\_attribute** subsection 19.3 on page 86  
**maintenance.make\_std\_term\_with\_attr** subsection 19.5 on page 87

### 19.3. Function read\_attribute As String

*MODIFIED 27 Oct 2005 - to read lookup patterns from database tables. input read\_std\_term. Generates a string characterising the important words of each Read term. e.g. TTIIFF means first two words are true, next two can be ignored, and last two are false. Results stored in the attr column of the terms table. Checking for ignorable and negative terms*

**Arguments:** **read\_std\_term** – String (Optional)  
**dont\_init\_pd** – Boolean (Optional)  
**init\_lookup** – Boolean (Optional)

**Subs and functions called:** **maintenance.init\_read\_attr\_tables** subsection 19.2 on page 86  
**pd.init\_read** subsection 13.21 on page 63  
**wordlist.remove\_ignore\_phrases** subsection 17.23 on page 82  
**pd.part\_punc** subsection 13.29 on page 65  
**strfunc.numwords** subsection 14.7 on page 67  
**strfunc.is\_text** subsection 14.6 on page 67  
**strfunc.dissect2** subsection 14.13 on page 69  
**wordlist.ignorable** subsection 17.20 on page 82  
**strfunc.words** subsection 14.4 on page 66  
**wordlist.ignore\_max** subsection 17.21 on page 82

**wordlist.ignore\_words** subsection 17.22 on page 82

**maintenance.rm\_attr** subsection 19.6 on page 87

**Called by:** **maintenance.make\_std\_term\_with\_attr** subsection 19.5 on page 87

## 19.4. Function **make\_std\_term** As String

*New function for std\_term - also converts a/n, c/o, h/o etc.*

**Arguments:** **raw\_term** – String (ByVal)

**init\_lookup** – Boolean (Optional)

**Subs and functions called:** **maintenance.make\_std\_term\_with\_attr** subsection 19.5 on page 87

**Called by:** none

## 19.5. Function **make\_std\_term\_with\_attr** As String

*New function for std\_term - also converts a/n, c/o, h/o etc. converts a Read term to std\_term format.*

**Arguments:** **raw\_term** – String (ByVal)

**init\_lookup** – Boolean (Optional)

**Subs and functions called:** **maintenance.init\_read\_attr\_tables** subsection 19.2 on page 86

**pd.init\_read** subsection 13.21 on page 63

**wordlist.remove\_ignore\_phrases** subsection 17.23 on page 82

**maintenance.read\_attribute** subsection 19.3 on page 86

**pd.part\_nopunc** subsection 13.16 on page 61

**Called by:** **maintenance.make\_std\_term** subsection 19.4 on page 87

**maintenance.process\_termlist** subsection 19.15 on page 90

## 19.6. Sub **rm\_attr**

*Output is the new attribute string. Instring is the Read term with punctuation*

**Arguments:** **instring** – String

**pattern** – String

**cur\_attr** – String

**new\_attr** – String

**Subs and functions called:** **strfunc.phrase\_match\_pattern** subsection 14.15 on page 70

**Called by:** `maintenance.read_attribute` subsection 19.3 on page 86

## 19.7. Sub `delete_long_terms`

*Deletes all terms with >6 non-ignorable words from 'terms' table and wordlist.*

**Arguments:** none

**Subs and functions called:** `maintenance.term_remove_NEW` subsection 19.13 on page 89  
`pd.Attr` subsection 13.9 on page 59

**Called by:** none

## 19.8. Sub `delete_superfluous_terms`

*Deletes all superfluous terms from 'terms' table and wordlist.*

**Arguments:** none

**Subs and functions called:** `terms.init` subsection 16.4 on page 75  
`terms.std_term` subsection 16.8 on page 76  
`maintenance.term_remove_NEW` subsection 19.13 on page 89  
`maintenance.find_similar_term` subsection 19.9 on page 88

**Called by:** none

## 19.9. Function `find_similar_term As Long`

*Returns the termref of a similar term without the or of an identical term*

**Arguments:** `interm` – String  
`start_phrase` – String (Optional)  
`end_phrase` – String (Optional)

**Subs and functions called:** `terms.exact_read_termref` subsection 16.6 on page 75

**Called by:** `maintenance.delete_superfluous_terms` subsection 19.8 on page 88

## 19.10. Sub `make_wordlist`

*Generates 3 tables: singlewords , doublewords, wordlist. Also generates the lookup table file.*

**Arguments:** none

**Subs and functions called:** `terms.std_term` subsection 16.8 on page 76  
`pd.Attr` subsection 13.9 on page 59  
`maintenance.count_t` subsection 19.11 on page 89



**strfunc.words** subsection 14.4 on page 66

**freetext\_core.outfile\_all** subsection 9.3 on page 46

**Called by:** none

## 19.11. Function **count\_t** As Integer

*minimum number of words in attr\_string*

**Arguments:** **attr\_string** – String

**Subs and functions called:** none

**Called by:** **maintenance.make\_wordlist** subsection 19.10 on page 88

## 19.12. Sub **term\_remove\_BATCH**

*comma separated list of termrefs*

**Arguments:** **Termref\_list** – String

**Comment** – String (Optional)

**Subs and functions called:** none

**Called by:** none

## 19.13. Sub **term\_remove\_NEW**

**Arguments:** **Termref** – Long

**Comment** – String (Optional)

**Subs and functions called:** none

**Called by:** **maintenance.delete\_long\_terms** subsection 19.7 on page 88

**maintenance.delete\_superfluous\_terms** subsection 19.8 on page 88

## 19.14. Function **read\_code\_oxmis** As String

**Arguments:** **oxmis\_termref** – Long

**Subs and functions called:** none

**Called by:** **maintenance.process\_termlist** subsection 19.15 on page 90

## 19.15. Sub process\_termlist

**Arguments:** `blank_only` – Boolean (Optional)

`not_readcode` – Boolean (Optional)

`termlist` – String (Optional)

**Subs and functions called:** `wordlist.init_ignore` subsection 17.5 on page 78

`maintenance.read_code_oxmis` subsection 19.14 on page 89

`maintenance.make_std_term_with_attr` subsection 19.5 on page 87

`terms.std_term` subsection 16.8 on page 76

`pd.Attr` subsection 13.9 on page 59

`strfunc.dissect2` subsection 14.13 on page 69

**Called by:** none

## 19.16. Sub expand\_rightleft

*Processes termlist: converts l and lt to left, and vice versa for right; only if the termlist contains terms for BOTH RIGHT AND LEFT. Need to regenerate wordlists afterwards.*

**Arguments:** none

**Subs and functions called:** `terms.std_term` subsection 16.8 on page 76

**Called by:** none
